# Supplementary material
Source: PubMed Central journal article supplement (PMC1895720)
Supplement: blood_2005-06-2338_1.pdf [file blood_2005-06-2338_1.pdf]

| Gene   | Chromosome | SNP source             | Source ID | rs#        |
|--------|------------|------------------------|-----------|------------|
| BPI    | 20         | Innate<br>Immunity PGA | 2738      | rs5741798  |
|        |            |                        | 6279      | rs5741800  |
|        |            |                        | 9083      | rs5743507  |
|        |            |                        | 10214     | rs3746476  |
|        |            |                        | 17016     | rs4358188  |
|        |            |                        | 23356     | rs5741806  |
|        |            |                        | 33065     | rs2275954  |
|        |            |                        | 36045     | rs1131847  |
| CD14   | 5          | Innate<br>Immunity PGA | 1741      | rs2569193  |
|        |            |                        | 7066      | rs2569190  |
|        |            |                        | 5370      | rs3138076  |
|        |            |                        | 8514      | rs4914     |
| IL-10  | 1          |                        | 915       | rs1800896  |
|        |            |                        | 1405      | rs1800872  |
|        |            |                        | 3699      | rs3024492  |
|        |            |                        | 3843      | rs3024493  |
| IL-1B  | 2          | SeattleSNP             | 1274      | rs1143627  |
|        |            |                        | 5200      | rs1143633  |
|        |            |                        | 5277      | rs1143634  |
|        |            |                        | 8234      | rs1143639  |
| IL-1RN | 2          | SeattleSNP             | 1018      | rs4251961  |
|        |            |                        | 3331      | rs2637988  |
|        |            |                        | 10257     | rs315934   |
|        |            |                        | 13760     | rs419598   |
|        |            |                        | 13888     | rs2232354  |
| IL-6   | 7          | SeattleSNP             | 321       | rs2069827  |
|        |            |                        | 1510      | rs1800795  |
|        |            |                        | 3437      | rs2069840  |
| IRAK4  | 12         | SeattleSNP             | 133       | rs4251565  |
|        |            |                        | 13823     | rs1451567  |
|        |            |                        | 23338     | rs4251513  |
| LBP    | 20         | Innate<br>Immunity PGA | 541       | rs1780616  |
|        |            |                        | 1598      | rs5741812  |
|        |            |                        | 5584      | rs1739654  |
|        |            |                        | 6878      | rs2232582  |
|        |            |                        | 7400      | rs6025083  |
|        |            |                        | 13506     | rs11536949 |
|        |            |                        | 17002     | rs2232596  |
|        |            |                        | 25276     | rs2232613  |
|        |            |                        | 28559     | rs11536988 |
| 33158  | rs745144   |                        |           |            |
| TIRAP  | 11         | SeattleSNP             | 154       | rs672908   |
|        |            |                        | 1576      | rs595022   |
|        |            |                        | 9537      | rs646005   |

|       |    |                        |       |            |
|-------|----|------------------------|-------|------------|
|       |    |                        | 13110 | rs3802814  |
|       |    |                        | 13365 | rs7932766  |
| TLR2  | 4  | Innate<br>Immunity PGA | 1868  | rs1898830  |
|       |    |                        | 29886 | rs3804099  |
|       |    |                        | 31632 | rs5743709  |
|       |    |                        | 30639 | rs3804100  |
| TLR3  | 4  | Innate<br>Immunity PGA | 18917 | rs5743312  |
|       |    |                        | 19028 | rs5743314  |
|       |    |                        | 22793 | rs3775291  |
| TLR4  | 9  | Innate<br>Immunity PGA | 851   | rs2770150  |
|       |    |                        | 1893  | rs1927911  |
|       |    |                        | 2856  | rs1927907  |
|       |    |                        | 9263  | rs11536878 |
|       |    |                        | 13015 | rs4986791  |
|       |    |                        | 15844 | rs11536889 |
|       |    |                        | 16649 | rs11536898 |
| TLR6  | 4  | Innate<br>Immunity PGA | 1166  | rs5743795  |
|       |    |                        | 2065  | rs1039559  |
|       |    |                        | 3649  | rs3821985  |
| TNF   | 6  | SeattleSNP             | 282   | rs1800629  |
|       |    |                        | 352   | rs361525   |
| TRAF6 | 11 | SeattleSNP             | 1893  | rs5030414  |
|       |    |                        | 8015  | rs5030423  |
|       |    |                        | 15240 | rs5030454  |
