# Supplementary material
Source: PubMed Central journal article supplement (PMC1895720)
Supplement: blood_2005-06-2338_2.pdf [file blood_2005-06-2338_2.pdf]

## Patient Genotypes

IL-10 915

| Coding | Control<br>Freq | (S.E.)  | Case<br>Freq | (S.E.)  | Coefficient | (S.E.)  | Odds<br>Ratio | Confidence<br>Interval | Z-score | p-value |
|--------|-----------------|---------|--------------|---------|-------------|---------|---------------|------------------------|---------|---------|
| A      | 0.58370         | (0.024) | 0.50769      | (0.031) |             |         | 1.00          |                        |         |         |
| G      | 0.41630         | (0.024) | 0.49231      | (0.031) | 0.27881     | (0.160) | 1.32          | (0.97, 1.81)           | 1.74    | 0.081   |

\*\*\*\*\*

IL-10 1405

| Coding | Control<br>Freq | (S.E.)  | Case<br>Freq | (S.E.)  | Coefficient | (S.E.)  | Odds<br>Ratio | Confidence<br>Interval | Z-score | p-value |
|--------|-----------------|---------|--------------|---------|-------------|---------|---------------|------------------------|---------|---------|
| C      | 0.72444         | (0.021) | 0.75940      | (0.027) |             |         | 1.00          |                        |         |         |
| A      | 0.27556         | (0.021) | 0.24060      | (0.027) | -0.15258    | (0.188) | 0.86          | (0.59, 1.24)           | -0.81   | 0.417   |

\*\*\*\*\*

IL-10 3699

| Coding | Control<br>Freq | (S.E.)  | Case<br>Freq | (S.E.)  | Coefficient | (S.E.)  | Odds<br>Ratio | Confidence<br>Interval | Z-score | p-value |
|--------|-----------------|---------|--------------|---------|-------------|---------|---------------|------------------------|---------|---------|
| A      | 0.76906         | (0.020) | 0.74242      | (0.027) |             |         | 1.00          |                        |         |         |
| T      | 0.23094         | (0.020) | 0.25758      | (0.027) | 0.11544     | (0.190) | 1.12          | (0.77, 1.63)           | 0.61    | 0.544   |

\*\*\*\*\*

IL-10 3843

| Coding | Control<br>Freq | (S.E.)  | Case<br>Freq | (S.E.)  | Coefficient | (S.E.)  | Odds<br>Ratio | Confidence<br>Interval | Z-score | p-value |
|--------|-----------------|---------|--------------|---------|-------------|---------|---------------|------------------------|---------|---------|
| G      | 0.85586         | (0.016) | 0.83721      | (0.023) |             |         | 1.00          |                        |         |         |
| T      | 0.14414         | (0.016) | 0.16279      | (0.023) | 0.09521     | (0.229) | 1.10          | (0.70, 1.72)           | 0.42    | 0.677   |

\*\*\*\*\*

IL-1B 1274

| Coding | Control<br>Freq | (S.E.)  | Case<br>Freq | (S.E.)  | Coefficient | (S.E.)  | Odds<br>Ratio | Confidence<br>Interval | Z-score | p-value |
|--------|-----------------|---------|--------------|---------|-------------|---------|---------------|------------------------|---------|---------|
| T      | 0.66520         | (0.022) | 0.64729      | (0.028) |             |         | 1.00          |                        |         |         |
| C      | 0.33480         | (0.022) | 0.35271      | (0.028) | 0.06789     | (0.179) | 1.07          | (0.75, 1.52)           | 0.38    | 0.704   |

\*\*\*\*\*

IL-1B 5200

| Coding | Control<br>Freq | (S.E.)  | Case<br>Freq | (S.E.)  | Coefficient | (S.E.)  | Odds<br>Ratio | Confidence<br>Interval | Z-score | p-value |
|--------|-----------------|---------|--------------|---------|-------------|---------|---------------|------------------------|---------|---------|
| G      | 0.65991         | (0.023) | 0.64015      | (0.029) |             |         | 1.00          |                        |         |         |
| A      | 0.34009         | (0.023) | 0.35985      | (0.029) | 0.11903     | (0.161) | 1.13          | (0.82, 1.54)           | 0.74    | 0.459   |

\*\*\*\*\*

IL-1B 5277

| Coding | Control<br>Freq | (S.E.)  | Case<br>Freq | (S.E.)  | Coefficient | (S.E.)  | Odds<br>Ratio | Confidence<br>Interval | Z-score | p-value |
|--------|-----------------|---------|--------------|---------|-------------|---------|---------------|------------------------|---------|---------|
| C      | 0.75664         | (0.020) | 0.84091      | (0.024) |             |         | 1.00          |                        |         |         |
| T      | 0.24336         | (0.020) | 0.15909      | (0.024) | -0.59133    | (0.209) | 0.55          | (0.37, 0.83)           | -2.82   | 0.005   |

\*\*\*\*\*

IL-1B 8234

| Coding | Control Freq | (S.E.)  | Case Freq | (S.E.)  | Coefficient | (S.E.)  | Odds Ratio | Confidence Interval | Z-score | p-value |
|--------|--------------|---------|-----------|---------|-------------|---------|------------|---------------------|---------|---------|
| G      | 0.75443      | (0.020) | 0.83969   | (0.024) |             |         | 1.00       |                     |         |         |
| C      | 0.24557      | (0.020) | 0.16031   | (0.024) | -0.60609    | (0.213) | 0.55       | (0.36, 0.83)        | -2.84   | 0.004   |

\*\*\*\*\*

IL-1rn 1018

| Coding | Control Freq | (S.E.)  | Case Freq | (S.E.)  | Coefficient | (S.E.)  | Odds Ratio | Confidence Interval | Z-score | p-value |
|--------|--------------|---------|-----------|---------|-------------|---------|------------|---------------------|---------|---------|
| T      | 0.62611      | (0.023) | 0.62692   | (0.030) |             |         | 1.00       |                     |         |         |
| C      | 0.37389      | (0.023) | 0.37308   | (0.030) | -0.00084    | (0.154) | 1.00       | (0.74, 1.35)        | -0.01   | 0.996   |

\*\*\*\*\*

IL-1rn 3331

| Coding | Control Freq | (S.E.)  | Case Freq | (S.E.)  | Coefficient | (S.E.)  | Odds Ratio | Confidence Interval | Z-score | p-value |
|--------|--------------|---------|-----------|---------|-------------|---------|------------|---------------------|---------|---------|
| A      | 0.60135      | (0.022) | 0.61923   | (0.030) |             |         | 1.00       |                     |         |         |
| G      | 0.39865      | (0.022) | 0.38077   | (0.030) | -0.09608    | (0.167) | 0.91       | (0.66, 1.26)        | -0.58   | 0.565   |

\*\*\*\*\*

IL-1rn 10257

| Coding | Control Freq | (S.E.)  | Case Freq | (S.E.)  | Coefficient | (S.E.)  | Odds Ratio | Confidence Interval | Z-score | p-value |
|--------|--------------|---------|-----------|---------|-------------|---------|------------|---------------------|---------|---------|
| T      | 0.84434      | (0.016) | 0.81746   | (0.025) |             |         | 1.00       |                     |         |         |
| C      | 0.15566      | (0.016) | 0.18254   | (0.025) | 0.19948     | (0.218) | 1.22       | (0.80, 1.87)        | 0.91    | 0.360   |

\*\*\*\*\*

IL-1rn 13760

| Coding | Control Freq | (S.E.)  | Case Freq | (S.E.)  | Coefficient | (S.E.)  | Odds Ratio | Confidence Interval | Z-score | p-value |
|--------|--------------|---------|-----------|---------|-------------|---------|------------|---------------------|---------|---------|
| T      | 0.74670      | (0.020) | 0.73485   | (0.028) |             |         | 1.00       |                     |         |         |
| C      | 0.25330      | (0.020) | 0.26515   | (0.028) | 0.04517     | (0.179) | 1.05       | (0.74, 1.49)        | 0.25    | 0.801   |

\*\*\*\*\*

IL-1rn 16857

| Coding | Control Freq | (S.E.)  | Case Freq | (S.E.)  | Coefficient | (S.E.)  | Odds Ratio | Confidence Interval | Z-score | p-value |
|--------|--------------|---------|-----------|---------|-------------|---------|------------|---------------------|---------|---------|
| T      | 0.70705      | (0.022) | 0.75940   | (0.026) |             |         | 1.00       |                     |         |         |
| C      | 0.29295      | (0.022) | 0.24060   | (0.026) | -0.28858    | (0.178) | 0.75       | (0.53, 1.06)        | -1.62   | 0.106   |

\*\*\*\*\*

TLR2 1868

| Coding | Control Freq | (S.E.)  | Case Freq | (S.E.)  | Coefficient | (S.E.)  | Odds Ratio | Confidence Interval | Z-score | p-value |
|--------|--------------|---------|-----------|---------|-------------|---------|------------|---------------------|---------|---------|
| A      | 0.66071      | (0.024) | 0.61364   | (0.030) |             |         | 1.00       |                     |         |         |
| G      | 0.33929      | (0.024) | 0.38636   | (0.030) | 0.17253     | (0.155) | 1.19       | (0.88, 1.61)        | 1.11    | 0.265   |

\*\*\*\*\*

TLR2 29886

| Coding | Control Freq | (S.E.)  | Case Freq | (S.E.)  | Coefficient | (S.E.)  | Odds Ratio | Confidence Interval | Z-score | p-value |
|--------|--------------|---------|-----------|---------|-------------|---------|------------|---------------------|---------|---------|
| T      | 0.53917      | (0.024) | 0.56250   | (0.032) |             |         | 1.00       |                     |         |         |
| C      | 0.46083      | (0.024) | 0.43750   | (0.032) | -0.03561    | (0.153) | 0.97       | (0.71, 1.30)        | -0.23   | 0.816   |

\*\*\*\*\*

TLR2 30639

| Coding | Control Freq | (S.E.)  | Case Freq | (S.E.)  | Coefficient | (S.E.)  | Odds Ratio | Confidence Interval | Z-score | p-value |
|--------|--------------|---------|-----------|---------|-------------|---------|------------|---------------------|---------|---------|
| T      | 0.92699      | (0.012) | 0.91603   | (0.017) |             |         | 1.00       |                     |         |         |
| C      | 0.07301      | (0.012) | 0.08397   | (0.017) | 0.25257     | (0.279) | 1.29       | (0.75, 2.22)        | 0.91    | 0.365   |

\*\*\*\*\*

TLR2 31632

| Coding | Control Freq | (S.E.)  | Case Freq | (S.E.)  | Coefficient | (S.E.) | Odds Ratio | Confidence Interval | Z-score | p-value |
|--------|--------------|---------|-----------|---------|-------------|--------|------------|---------------------|---------|---------|
| G      | 0.99119      | (0.004) | 0.99237   | (0.005) |             |        | 1.00       |                     |         |         |

Uncommon haplotypes:

|   |         |         |         |         |
|---|---------|---------|---------|---------|
| A | 0.00881 | (xxxxx) | 0.00763 | (xxxxx) |
|---|---------|---------|---------|---------|

\*\*\*\*\*

TLR2 18917

| Coding | Control | (S.E.) | Case | (S.E.) | Coefficient | (S.E.) | Odds | Confidence | Z-score | p-value |
|--------|---------|--------|------|--------|-------------|--------|------|------------|---------|---------|
|--------|---------|--------|------|--------|-------------|--------|------|------------|---------|---------|

|   | Freq    | (S.E.)  | Freq    | (S.E.)  | Coefficient | (S.E.)  | Ratio | Interval     | Z-score | p-value |
|---|---------|---------|---------|---------|-------------|---------|-------|--------------|---------|---------|
| C | 0.81111 | (0.018) | 0.84496 | (0.020) |             |         | 1.00  |              |         |         |
| T | 0.18889 | (0.018) | 0.15504 | (0.020) | -0.19138    | (0.221) | 0.83  | (0.54, 1.27) | -0.87   | 0.386   |

\*\*\*\*\*

TLR3 19028

| Coding | Control | (S.E.)  | Case    | (S.E.)  | Coefficient | (S.E.)  | Odds  | Confidence   | Z-score | p-value |
|--------|---------|---------|---------|---------|-------------|---------|-------|--------------|---------|---------|
|        | Freq    |         | Freq    |         |             |         | Ratio | Interval     |         |         |
| C      | 0.77729 | (0.020) | 0.79771 | (0.025) |             |         | 1.00  |              |         |         |
| T      | 0.22271 | (0.020) | 0.20229 | (0.025) | -0.18130    | (0.183) | 0.83  | (0.58, 1.19) | -0.99   | 0.321   |

\*\*\*\*\*

TLR3 22793

| Coding | Control | (S.E.)  | Case    | (S.E.)  | Coefficient | (S.E.)  | Odds  | Confidence   | Z-score | p-value |
|--------|---------|---------|---------|---------|-------------|---------|-------|--------------|---------|---------|
|        | Freq    |         | Freq    |         |             |         | Ratio | Interval     |         |         |
| C      | 0.71272 | (0.021) | 0.75000 | (0.027) |             |         | 1.00  |              |         |         |
| T      | 0.28728 | (0.021) | 0.25000 | (0.027) | -0.17896    | (0.180) | 0.84  | (0.59, 1.19) | -0.99   | 0.320   |

\*\*\*\*\*

TLR6 1166

| Coding | Control | (S.E.)  | Case    | (S.E.)  | Coefficient | (S.E.)  | Odds  | Confidence   | Z-score | p-value |
|--------|---------|---------|---------|---------|-------------|---------|-------|--------------|---------|---------|
|        | Freq    |         | Freq    |         |             |         | Ratio | Interval     |         |         |
| G      | 0.80769 | (0.018) | 0.76894 | (0.025) |             |         | 1.00  |              |         |         |
| A      | 0.19231 | (0.018) | 0.23106 | (0.025) | 0.26830     | (0.202) | 1.31  | (0.88, 1.94) | 1.33    | 0.185   |

\*\*\*\*\*

TLR6 2065

| Coding | Control | (S.E.)  | Case    | (S.E.)  | Coefficient | (S.E.)  | Odds  | Confidence   | Z-score | p-value |
|--------|---------|---------|---------|---------|-------------|---------|-------|--------------|---------|---------|
|        | Freq    |         | Freq    |         |             |         | Ratio | Interval     |         |         |
| T      | 0.54000 | (0.022) | 0.56818 | (0.029) |             |         | 1.00  |              |         |         |
| C      | 0.46000 | (0.022) | 0.43182 | (0.029) | -0.11551    | (0.161) | 0.89  | (0.65, 1.22) | -0.72   | 0.473   |

\*\*\*\*\*

TLR6 3649

| Coding | Control | (S.E.)  | Case    | (S.E.)  | Coefficient | (S.E.)  | Odds  | Confidence   | Z-score | p-value |
|--------|---------|---------|---------|---------|-------------|---------|-------|--------------|---------|---------|
|        | Freq    |         | Freq    |         |             |         | Ratio | Interval     |         |         |
| C      | 0.65708 | (0.021) | 0.66154 | (0.030) |             |         | 1.00  |              |         |         |
| G      | 0.34292 | (0.021) | 0.33846 | (0.030) | -0.04519    | (0.170) | 0.96  | (0.69, 1.33) | -0.27   | 0.790   |

\*\*\*\*\*

CD14 4051

| Coding | Control | (S.E.)  | Case    | (S.E.)  | Coefficient | (S.E.)  | Odds  | Confidence   | Z-score | p-value |
|--------|---------|---------|---------|---------|-------------|---------|-------|--------------|---------|---------|
|        | Freq    |         | Freq    |         |             |         | Ratio | Interval     |         |         |
| T      | 0.77027 | (0.019) | 0.70769 | (0.029) |             |         | 1.00  |              |         |         |
| A      | 0.22973 | (0.019) | 0.29231 | (0.029) | 0.32421     | (0.188) | 1.38  | (0.96, 2.00) | 1.72    | 0.085   |

\*\*\*\*\*

CD14 4488

| Coding | Control | (S.E.)  | Case    | (S.E.)  | Coefficient | (S.E.)  | Odds  | Confidence   | Z-score | p-value |
|--------|---------|---------|---------|---------|-------------|---------|-------|--------------|---------|---------|
|        | Freq    |         | Freq    |         |             |         | Ratio | Interval     |         |         |
| C      | 0.76974 | (0.019) | 0.75954 | (0.026) |             |         | 1.00  |              |         |         |
| T      | 0.23026 | (0.019) | 0.24046 | (0.026) | 0.09060     | (0.189) | 1.09  | (0.76, 1.58) | 0.48    | 0.631   |

\*\*\*\*\*

CD14 7066

| Coding | Control | (S.E.)  | Case    | (S.E.)  | Coefficient | (S.E.)  | Odds  | Confidence   | Z-score | p-value |
|--------|---------|---------|---------|---------|-------------|---------|-------|--------------|---------|---------|
|        | Freq    |         | Freq    |         |             |         | Ratio | Interval     |         |         |
| T      | 0.51126 | (0.023) | 0.43750 | (0.030) |             |         | 1.00  |              |         |         |
| C      | 0.48874 | (0.023) | 0.56250 | (0.030) | 0.31775     | (0.167) | 1.37  | (0.99, 1.91) | 1.90    | 0.057   |

\*\*\*\*\*

CD14 8514

| Coding | Control | (S.E.)  | Case    | (S.E.)  | Coefficient | (S.E.)  | Odds  | Confidence   | Z-score | p-value |
|--------|---------|---------|---------|---------|-------------|---------|-------|--------------|---------|---------|
|        | Freq    |         | Freq    |         |             |         | Ratio | Interval     |         |         |
| G      | 0.87832 | (0.015) | 0.88636 | (0.020) |             |         | 1.00  |              |         |         |
| C      | 0.12168 | (0.015) | 0.11364 | (0.020) | 0.02765     | (0.248) | 1.03  | (0.63, 1.67) | 0.11    | 0.911   |

\*\*\*\*\*

TNF 282

| Coding | Control | (S.E.)  | Case    | (S.E.)  | Coefficient | (S.E.)  | Odds  | Confidence   | Z-score | p-value |
|--------|---------|---------|---------|---------|-------------|---------|-------|--------------|---------|---------|
|        | Freq    |         | Freq    |         |             |         | Ratio | Interval     |         |         |
| G      | 0.84081 | (0.017) | 0.88168 | (0.020) |             |         | 1.00  |              |         |         |
| A      | 0.15919 | (0.017) | 0.11832 | (0.020) | -0.43684    | (0.227) | 0.65  | (0.41, 1.01) | -1.92   | 0.054   |

\*\*\*\*\*

TNF 352

| Coding | Control Freq | (S.E.)  | Case Freq | (S.E.)  | Coefficient | (S.E.)  | Odds Ratio | Confidence Interval | Z-score | p-value |
|--------|--------------|---------|-----------|---------|-------------|---------|------------|---------------------|---------|---------|
| G      | 0.94643      | (0.010) | 0.95076   | (0.013) |             |         | 1.00       |                     |         |         |
| A      | 0.05357      | (0.010) | 0.04924   | (0.013) | 0.06502     | (0.361) | 1.07       | (0.53, 2.16)        | 0.18    | 0.857   |

\*\*\*\*\*

TNF 1009

| Coding | Control Freq | (S.E.)  | Case Freq | (S.E.)  | Coefficient | (S.E.)  | Odds Ratio | Confidence Interval | Z-score | p-value |
|--------|--------------|---------|-----------|---------|-------------|---------|------------|---------------------|---------|---------|
| G      | 0.97642      | (0.007) | 0.98387   | (0.007) |             |         | 1.00       |                     |         |         |
| A      | 0.02358      | (0.007) | 0.01613   | (0.007) | -0.08781    | (0.593) | 0.92       | (0.29, 2.93)        | -0.15   | 0.882   |

\*\*\*\*\*

TNF 4101

| Coding | Control Freq | (S.E.)  | Case Freq | (S.E.)  | Coefficient | (S.E.)  | Odds Ratio | Confidence Interval | Z-score | p-value |
|--------|--------------|---------|-----------|---------|-------------|---------|------------|---------------------|---------|---------|
| G      | 0.89333      | (0.014) | 0.92803   | (0.015) |             |         | 1.00       |                     |         |         |
| A      | 0.10667      | (0.014) | 0.07197   | (0.015) | -0.50196    | (0.286) | 0.61       | (0.35, 1.06)        | -1.76   | 0.079   |

\*\*\*\*\*

IL-6 321

| Coding | Control Freq | (S.E.)  | Case Freq | (S.E.)  | Coefficient | (S.E.)  | Odds Ratio | Confidence Interval | Z-score | p-value |
|--------|--------------|---------|-----------|---------|-------------|---------|------------|---------------------|---------|---------|
| G      | 0.92793      | (0.012) | 0.93077   | (0.015) |             |         | 1.00       |                     |         |         |
| T      | 0.07207      | (0.012) | 0.06923   | (0.015) | -0.03655    | (0.320) | 0.96       | (0.51, 1.81)        | -0.11   | 0.909   |

\*\*\*\*\*

IL-6 1510

| Coding | Control Freq | (S.E.)  | Case Freq | (S.E.)  | Coefficient | (S.E.)  | Odds Ratio | Confidence Interval | Z-score | p-value |
|--------|--------------|---------|-----------|---------|-------------|---------|------------|---------------------|---------|---------|
| G      | 0.63053      | (0.022) | 0.62308   | (0.029) |             |         | 1.00       |                     |         |         |
| C      | 0.36947      | (0.022) | 0.37692   | (0.029) | 0.01813     | (0.167) | 1.02       | (0.73, 1.41)        | 0.11    | 0.913   |

\*\*\*\*\*

IL-6 3437

| Coding | Control Freq | (S.E.)  | Case Freq | (S.E.)  | Coefficient | (S.E.)  | Odds Ratio | Confidence Interval | Z-score | p-value |
|--------|--------------|---------|-----------|---------|-------------|---------|------------|---------------------|---------|---------|
| C      | 0.65247      | (0.022) | 0.68702   | (0.028) |             |         | 1.00       |                     |         |         |
| G      | 0.34753      | (0.022) | 0.31298   | (0.028) | -0.15649    | (0.169) | 0.86       | (0.61, 1.19)        | -0.92   | 0.356   |

\*\*\*\*\*

TLR4 851

| Coding | Control Freq | (S.E.)  | Case Freq | (S.E.)  | Coefficient | (S.E.)  | Odds Ratio | Confidence Interval | Z-score | p-value |
|--------|--------------|---------|-----------|---------|-------------|---------|------------|---------------------|---------|---------|
| A      | 0.73636      | (0.020) | 0.74400   | (0.028) |             |         | 1.00       |                     |         |         |
| G      | 0.26364      | (0.020) | 0.25600   | (0.028) | 0.01254     | (0.187) | 1.01       | (0.70, 1.46)        | 0.07    | 0.946   |

\*\*\*\*\*

TLR4 1859

| Coding | Control Freq | (S.E.)  | Case Freq | (S.E.)  | Coefficient | (S.E.)  | Odds Ratio | Confidence Interval | Z-score | p-value |
|--------|--------------|---------|-----------|---------|-------------|---------|------------|---------------------|---------|---------|
| G      | 0.59641      | (0.022) | 0.61364   | (0.030) |             |         | 1.00       |                     |         |         |
| A      | 0.40359      | (0.022) | 0.38636   | (0.030) | -0.04526    | (0.165) | 0.96       | (0.69, 1.32)        | -0.27   | 0.784   |

\*\*\*\*\*

TLR4 1893

| Coding | Control Freq | (S.E.)  | Case Freq | (S.E.)  | Coefficient | (S.E.)  | Odds Ratio | Confidence Interval | Z-score | p-value |
|--------|--------------|---------|-----------|---------|-------------|---------|------------|---------------------|---------|---------|
| A      | 0.67111      | (0.022) | 0.64453   | (0.027) |             |         | 1.00       |                     |         |         |
| G      | 0.32889      | (0.022) | 0.35547   | (0.027) | 0.04164     | (0.166) | 1.04       | (0.75, 1.44)        | 0.25    | 0.802   |

\*\*\*\*\*

TLR4 2856

| Coding | Control Freq | (S.E.)  | Case Freq | (S.E.)  | Coefficient | (S.E.)  | Odds Ratio | Confidence Interval | Z-score | p-value |
|--------|--------------|---------|-----------|---------|-------------|---------|------------|---------------------|---------|---------|
| T      | 0.84932      | (0.017) | 0.86822   | (0.020) |             |         | 1.00       |                     |         |         |
| C      | 0.15069      | (0.017) | 0.13178   | (0.020) | -0.22446    | (0.222) | 0.80       | (0.52, 1.23)        | -1.01   | 0.312   |

\*\*\*\*\*

TLR4 9263

| Coding | Control Freq | (S.E.) | Case Freq | (S.E.) | Coefficient | (S.E.) | Odds Ratio | Confidence Interval | Z-score | p-value |
|--------|--------------|--------|-----------|--------|-------------|--------|------------|---------------------|---------|---------|
|--------|--------------|--------|-----------|--------|-------------|--------|------------|---------------------|---------|---------|

|   |         |         |         |         |         |         |      |              |      |       |
|---|---------|---------|---------|---------|---------|---------|------|--------------|------|-------|
| C | 0.89380 | (0.014) | 0.88346 | (0.021) |         |         | 1.00 |              |      |       |
| A | 0.10620 | (0.014) | 0.11654 | (0.021) | 0.01529 | (0.249) | 1.02 | (0.62, 1.65) | 0.06 | 0.951 |

\*\*\*\*\*

TLR4 13015

| Coding | Control Freq | (S.E.)  | Case Freq | (S.E.)  | Coefficient | (S.E.)  | Odds Ratio | Confidence Interval | Z-score | p-value |
|--------|--------------|---------|-----------|---------|-------------|---------|------------|---------------------|---------|---------|
| A      | 0.94690      | (0.011) | 0.93561   | (0.014) |             |         | 1.00       |                     |         |         |
| G      | 0.05310      | (0.011) | 0.06439   | (0.014) | 0.22763     | (0.331) | 1.26       | (0.66, 2.40)        | 0.69    | 0.492   |

\*\*\*\*\*

TLR4 15844

| Coding | Control Freq | (S.E.)  | Case Freq | (S.E.)  | Coefficient | (S.E.)  | Odds Ratio | Confidence Interval | Z-score | p-value |
|--------|--------------|---------|-----------|---------|-------------|---------|------------|---------------------|---------|---------|
| G      | 0.84716      | (0.016) | 0.86842   | (0.021) |             |         | 1.00       |                     |         |         |
| C      | 0.15284      | (0.016) | 0.13158   | (0.021) | -0.15529    | (0.248) | 0.86       | (0.53, 1.39)        | -0.63   | 0.532   |

\*\*\*\*\*

TLR4 16649

| Coding | Control Freq | (S.E.)  | Case Freq | (S.E.)  | Coefficient | (S.E.)  | Odds Ratio | Confidence Interval | Z-score | p-value |
|--------|--------------|---------|-----------|---------|-------------|---------|------------|---------------------|---------|---------|
| G      | 0.85903      | (0.016) | 0.86923   | (0.021) |             |         | 1.00       |                     |         |         |
| C      | 0.14097      | (0.016) | 0.13077   | (0.021) | -0.29271    | (0.243) | 0.75       | (0.46, 1.20)        | -1.20   | 0.229   |

\*\*\*\*\*

tirap 154

| Coding | Control Freq | (S.E.)  | Case Freq | (S.E.)  | Coefficient | (S.E.)  | Odds Ratio | Confidence Interval | Z-score | p-value |
|--------|--------------|---------|-----------|---------|-------------|---------|------------|---------------------|---------|---------|
| G      | 0.77293      | (0.021) | 0.77068   | (0.026) |             |         | 1.00       |                     |         |         |
| C      | 0.22707      | (0.021) | 0.22932   | (0.026) | 0.05348     | (0.181) | 1.05       | (0.74, 1.50)        | 0.30    | 0.768   |

\*\*\*\*\*

tirap 1750

| Coding | Control Freq | (S.E.)  | Case Freq | (S.E.)  | Coefficient | (S.E.)  | Odds Ratio | Confidence Interval | Z-score | p-value |
|--------|--------------|---------|-----------|---------|-------------|---------|------------|---------------------|---------|---------|
| C      | 0.74670      | (0.021) | 0.77444   | (0.027) |             |         | 1.00       |                     |         |         |
| G      | 0.25330      | (0.021) | 0.22556   | (0.027) | -0.17587    | (0.174) | 0.84       | (0.60, 1.18)        | -1.01   | 0.311   |

\*\*\*\*\*

tirap 9537

| Coding | Control Freq | (S.E.)  | Case Freq | (S.E.)  | Coefficient | (S.E.)  | Odds Ratio | Confidence Interval | Z-score | p-value |
|--------|--------------|---------|-----------|---------|-------------|---------|------------|---------------------|---------|---------|
| T      | 0.61894      | (0.023) | 0.59774   | (0.030) |             |         | 1.00       |                     |         |         |
| C      | 0.38106      | (0.023) | 0.40226   | (0.030) | 0.07445     | (0.161) | 1.08       | (0.79, 1.48)        | 0.46    | 0.644   |

\*\*\*\*\*

tirap 13110

| Coding | Control Freq | (S.E.)  | Case Freq | (S.E.)  | Coefficient | (S.E.)  | Odds Ratio | Confidence Interval | Z-score | p-value |
|--------|--------------|---------|-----------|---------|-------------|---------|------------|---------------------|---------|---------|
| G      | 0.85616      | (0.016) | 0.84615   | (0.021) |             |         | 1.00       |                     |         |         |
| A      | 0.14384      | (0.016) | 0.15385   | (0.021) | 0.01989     | (0.232) | 1.02       | (0.65, 1.61)        | 0.09    | 0.932   |

\*\*\*\*\*

tirap 13365

| Coding | Control Freq | (S.E.)  | Case Freq | (S.E.)  | Coefficient | (S.E.)  | Odds Ratio | Confidence Interval | Z-score | p-value |
|--------|--------------|---------|-----------|---------|-------------|---------|------------|---------------------|---------|---------|
| C      | 0.75221      | (0.023) | 0.76316   | (0.029) |             |         | 1.00       |                     |         |         |
| T      | 0.24779      | (0.023) | 0.23684   | (0.029) | -0.05852    | (0.166) | 0.94       | (0.68, 1.31)        | -0.35   | 0.724   |

\*\*\*\*\*

traf 1893

| Coding | Control Freq | (S.E.)  | Case Freq | (S.E.)  | Coefficient | (S.E.)  | Odds Ratio | Confidence Interval | Z-score | p-value |
|--------|--------------|---------|-----------|---------|-------------|---------|------------|---------------------|---------|---------|
| G      | 0.88222      | (0.015) | 0.87500   | (0.021) |             |         | 1.00       |                     |         |         |
| A      | 0.11778      | (0.015) | 0.12500   | (0.021) | 0.08458     | (0.251) | 1.09       | (0.67, 1.78)        | 0.34    | 0.736   |

\*\*\*\*\*

traf6 8015

| Coding | Control Freq | (S.E.)  | Case Freq | (S.E.)  | Coefficient | (S.E.)  | Odds Ratio | Confidence Interval | Z-score | p-value |
|--------|--------------|---------|-----------|---------|-------------|---------|------------|---------------------|---------|---------|
| T      | 0.84956      | (0.017) | 0.84496   | (0.022) |             |         | 1.00       |                     |         |         |
| C      | 0.15044      | (0.017) | 0.15504   | (0.022) | -0.03145    | (0.221) | 0.97       | (0.63, 1.50)        | -0.14   | 0.887   |

\*\*\*\*\*

traf6 17551

| Coding | Control Freq | (S.E.)  | Case Freq | (S.E.)  | Coefficient | (S.E.)  | Odds Ratio | Confidence Interval | Z-score | p-value |
|--------|--------------|---------|-----------|---------|-------------|---------|------------|---------------------|---------|---------|
| A      | 0.58945      | (0.022) | 0.61450   | (0.029) |             |         | 1.00       |                     |         |         |
| C      | 0.41055      | (0.022) | 0.38550   | (0.029) | -0.10296    | (0.168) | 0.90       | (0.65, 1.26)        | -0.61   | 0.541   |

\*\*\*\*\*

irak4 133

| Coding | Control Freq | (S.E.)  | Case Freq | (S.E.)  | Coefficient | (S.E.)  | Odds Ratio | Confidence Interval | Z-score | p-value |
|--------|--------------|---------|-----------|---------|-------------|---------|------------|---------------------|---------|---------|
| G      | 0.52336      | (0.007) | 0.51563   | (0.007) |             |         | 1.00       |                     |         |         |
| A      | 0.47664      | (0.007) | 0.48438   | (0.007) | 0.24119     | (0.715) | 1.27       | (0.31, 5.17)        | 0.34    | 0.736   |

\*\*\*\*\*

irak4 13823

| Coding | Control Freq | (S.E.)  | Case Freq | (S.E.)  | Coefficient | (S.E.)  | Odds Ratio | Confidence Interval | Z-score | p-value |
|--------|--------------|---------|-----------|---------|-------------|---------|------------|---------------------|---------|---------|
| G      | 0.74554      | (0.021) | 0.73308   | (0.026) |             |         | 1.00       |                     |         |         |
| A      | 0.25446      | (0.021) | 0.26692   | (0.026) | 0.00695     | (0.176) | 1.01       | (0.71, 1.42)        | 0.04    | 0.968   |

\*\*\*\*\*

irak4 23338

| Coding | Control Freq | (S.E.)  | Case Freq | (S.E.)  | Coefficient | (S.E.)  | Odds Ratio | Confidence Interval | Z-score | p-value |
|--------|--------------|---------|-----------|---------|-------------|---------|------------|---------------------|---------|---------|
| G      | 0.50225      | (0.022) | 0.51136   | (0.028) |             |         | 1.00       |                     |         |         |
| C      | 0.49775      | (0.022) | 0.48864   | (0.028) | -0.08268    | (0.169) | 0.92       | (0.66, 1.28)        | -0.49   | 0.625   |

\*\*\*\*\*

bpi 2738

| Coding | Control Freq | (S.E.)  | Case Freq | (S.E.)  | Coefficient | (S.E.)  | Odds Ratio | Confidence Interval | Z-score | p-value |
|--------|--------------|---------|-----------|---------|-------------|---------|------------|---------------------|---------|---------|
| C      | 0.82735      | (0.017) | 0.80233   | (0.025) |             |         | 1.00       |                     |         |         |
| G      | 0.17265      | (0.017) | 0.19767   | (0.025) | 0.11068     | (0.204) | 1.12       | (0.75, 1.67)        | 0.54    | 0.588   |

\*\*\*\*\*

bpi 7258

| Coding | Control Freq | (S.E.)  | Case Freq | (S.E.)  | Coefficient | (S.E.)  | Odds Ratio | Confidence Interval | Z-score | p-value |
|--------|--------------|---------|-----------|---------|-------------|---------|------------|---------------------|---------|---------|
| G      | 0.62444      | (0.021) | 0.58271   | (0.031) |             |         | 1.00       |                     |         |         |
| A      | 0.37556      | (0.021) | 0.41729   | (0.031) | 0.11015     | (0.168) | 1.12       | (0.80, 1.55)        | 0.66    | 0.512   |

\*\*\*\*\*

bpi 9083

| Coding | Control Freq | (S.E.)  | Case Freq | (S.E.)  | Coefficient | (S.E.)  | Odds Ratio | Confidence Interval | Z-score | p-value |
|--------|--------------|---------|-----------|---------|-------------|---------|------------|---------------------|---------|---------|
| G      | 0.87719      | (0.016) | 0.89015   | (0.020) |             |         | 1.00       |                     |         |         |
| C      | 0.12281      | (0.016) | 0.10985   | (0.020) | -0.06675    | (0.241) | 0.94       | (0.58, 1.50)        | -0.28   | 0.782   |

\*\*\*\*\*

bpi 10214

| Coding | Control Freq | (S.E.)  | Case Freq | (S.E.)  | Coefficient | (S.E.)  | Odds Ratio | Confidence Interval | Z-score | p-value |
|--------|--------------|---------|-----------|---------|-------------|---------|------------|---------------------|---------|---------|
| A      | 0.87111      | (0.016) | 0.88346   | (0.021) |             |         | 1.00       |                     |         |         |
| G      | 0.12889      | (0.016) | 0.11654   | (0.021) | -0.14488    | (0.220) | 0.87       | (0.56, 1.33)        | -0.66   | 0.510   |

\*\*\*\*\*

bpi 17016

| Coding | Control Freq | (S.E.)  | Case Freq | (S.E.)  | Coefficient | (S.E.)  | Odds Ratio | Confidence Interval | Z-score | p-value |
|--------|--------------|---------|-----------|---------|-------------|---------|------------|---------------------|---------|---------|
| A      | 0.50901      | (0.022) | 0.46923   | (0.032) |             |         | 1.00       |                     |         |         |
| G      | 0.49099      | (0.022) | 0.53077   | (0.032) | 0.11566     | (0.164) | 1.12       | (0.81, 1.55)        | 0.70    | 0.482   |

\*\*\*\*\*

bpi 23356

| Coding | Control Freq | (S.E.)  | Case Freq | (S.E.)  | Coefficient | (S.E.)  | Odds Ratio | Confidence Interval | Z-score | p-value |
|--------|--------------|---------|-----------|---------|-------------|---------|------------|---------------------|---------|---------|
| C      | 0.59735      | (0.022) | 0.64773   | (0.029) |             |         | 1.00       |                     |         |         |
| T      | 0.40265      | (0.022) | 0.35227   | (0.029) | -0.13814    | (0.169) | 0.87       | (0.63, 1.21)        | -0.82   | 0.414   |

\*\*\*\*\*

bpi 33065

| Coding | Control Freq | (S.E.)  | Case Freq | (S.E.)  | Coefficient | (S.E.) | Odds Ratio | Confidence Interval | Z-score | p-value |
|--------|--------------|---------|-----------|---------|-------------|--------|------------|---------------------|---------|---------|
| G      | 0.53571      | (0.024) | 0.43411   | (0.031) |             |        | 1.00       |                     |         |         |

A 0.46429 (0.024) 0.56589 (0.031) 0.32287 (0.156) 1.38 (1.02, 1.87) 2.07 0.038

\*\*\*\*\*

bpi 36045

| Coding | Control Freq | (S.E.)  | Case Freq | (S.E.)  | Coefficient | (S.E.)  | Odds Ratio | Confidence Interval | Z-score | p-value |
|--------|--------------|---------|-----------|---------|-------------|---------|------------|---------------------|---------|---------|
| G      | 0.63053      | (0.024) | 0.55000   | (0.032) |             |         | 1.00       |                     |         |         |
| A      | 0.36947      | (0.024) | 0.45000   | (0.032) | 0.34443     | (0.155) | 1.41       | (1.04, 1.91)        | 2.22    | 0.027   |

\*\*\*\*\*

lbp 541

| Coding | Control Freq | (S.E.)  | Case Freq | (S.E.)  | Coefficient | (S.E.)  | Odds Ratio | Confidence Interval | Z-score | p-value |
|--------|--------------|---------|-----------|---------|-------------|---------|------------|---------------------|---------|---------|
| C      | 0.65402      | (0.023) | 0.59091   | (0.031) |             |         | 1.00       |                     |         |         |
| T      | 0.34598      | (0.023) | 0.40909   | (0.031) | 0.28176     | (0.158) | 1.33       | (0.97, 1.81)        | 1.78    | 0.074   |

\*\*\*\*\*

lbp 1598

| Coding | Control Freq | (S.E.)  | Case Freq | (S.E.)  | Coefficient | (S.E.)  | Odds Ratio | Confidence Interval | Z-score | p-value |
|--------|--------------|---------|-----------|---------|-------------|---------|------------|---------------------|---------|---------|
| A      | 0.87668      | (0.015) | 0.86923   | (0.021) |             |         | 1.00       |                     |         |         |
| T      | 0.12332      | (0.015) | 0.13077   | (0.021) | 0.04171     | (0.237) | 1.04       | (0.66, 1.66)        | 0.18    | 0.860   |

\*\*\*\*\*

lbp 1756

| Coding | Control Freq | (S.E.)  | Case Freq | (S.E.)  | Coefficient | (S.E.)  | Odds Ratio | Confidence Interval | Z-score | p-value |
|--------|--------------|---------|-----------|---------|-------------|---------|------------|---------------------|---------|---------|
| A      | 0.87557      | (0.015) | 0.85496   | (0.022) |             |         | 1.00       |                     |         |         |
| G      | 0.12443      | (0.015) | 0.14504   | (0.022) | 0.12574     | (0.225) | 1.13       | (0.73, 1.76)        | 0.56    | 0.575   |

\*\*\*\*\*

lbp 5584

| Coding | Control Freq | (S.E.)  | Case Freq | (S.E.)  | Coefficient | (S.E.)  | Odds Ratio | Confidence Interval | Z-score | p-value |
|--------|--------------|---------|-----------|---------|-------------|---------|------------|---------------------|---------|---------|
| G      | 0.95139      | (0.010) | 0.95238   | (0.013) |             |         | 1.00       |                     |         |         |
| A      | 0.04861      | (0.010) | 0.04762   | (0.013) | 0.13183     | (0.350) | 1.14       | (0.57, 2.27)        | 0.38    | 0.707   |

\*\*\*\*\*

lbp 7400

| Coding | Control Freq | (S.E.)  | Case Freq | (S.E.)  | Coefficient | (S.E.)  | Odds Ratio | Confidence Interval | Z-score | p-value |
|--------|--------------|---------|-----------|---------|-------------|---------|------------|---------------------|---------|---------|
| T      | 0.55778      | (0.024) | 0.51938   | (0.031) |             |         | 1.00       |                     |         |         |
| C      | 0.44222      | (0.024) | 0.48062   | (0.031) | 0.17248     | (0.148) | 1.19       | (0.89, 1.59)        | 1.16    | 0.245   |

\*\*\*\*\*

lbp 13506

| Coding | Control Freq | (S.E.)  | Case Freq | (S.E.)  | Coefficient | (S.E.)  | Odds Ratio | Confidence Interval | Z-score | p-value |
|--------|--------------|---------|-----------|---------|-------------|---------|------------|---------------------|---------|---------|
| G      | 0.93142      | (0.012) | 0.90151   | (0.017) |             |         | 1.00       |                     |         |         |
| T      | 0.06858      | (0.012) | 0.09849   | (0.017) | 0.31109     | (0.301) | 1.36       | (0.76, 2.46)        | 1.03    | 0.301   |

\*\*\*\*\*

lbp 17002

| Coding | Control Freq | (S.E.)  | Case Freq | (S.E.)  | Coefficient | (S.E.)  | Odds Ratio | Confidence Interval | Z-score | p-value |
|--------|--------------|---------|-----------|---------|-------------|---------|------------|---------------------|---------|---------|
| A      | 0.51786      | (0.024) | 0.58077   | (0.030) |             |         | 1.00       |                     |         |         |
| G      | 0.48214      | (0.024) | 0.41923   | (0.030) | -0.26560    | (0.155) | 0.77       | (0.57, 1.04)        | -1.72   | 0.086   |

\*\*\*\*\*

lbp 25276

| Coding | Control Freq | (S.E.)  | Case Freq | (S.E.)  | Coefficient | (S.E.)  | Odds Ratio | Confidence Interval | Z-score | p-value |
|--------|--------------|---------|-----------|---------|-------------|---------|------------|---------------------|---------|---------|
| C      | 0.93805      | (0.011) | 0.90226   | (0.017) |             |         | 1.00       |                     |         |         |
| T      | 0.06195      | (0.011) | 0.09774   | (0.017) | 0.46098     | (0.308) | 1.59       | (0.87, 2.90)        | 1.50    | 0.134   |

\*\*\*\*\*

lbp 28559

| Coding | Control Freq | (S.E.)  | Case Freq | (S.E.)  | Coefficient | (S.E.)  | Odds Ratio | Confidence Interval | Z-score | p-value |
|--------|--------------|---------|-----------|---------|-------------|---------|------------|---------------------|---------|---------|
| T      | 0.94931      | (0.011) | 0.94355   | (0.014) |             |         | 1.00       |                     |         |         |
| A      | 0.05069      | (0.011) | 0.05645   | (0.014) | -0.10131    | (0.347) | 0.90       | (0.46, 1.78)        | -0.29   | 0.770   |

\*\*\*\*\*

lbp 33158

| Coding | Control Freq | (S.E.)  | Case Freq | (S.E.)  | Coefficient | (S.E.)  | Odds Ratio | Confidence Interval | Z-score | p-value |
|--------|--------------|---------|-----------|---------|-------------|---------|------------|---------------------|---------|---------|
| C      | 0.56977      | (0.024) | 0.61290   | (0.032) |             |         | 1.00       |                     |         |         |
| T      | 0.43023      | (0.024) | 0.38710   | (0.032) | -0.19553    | (0.156) | 0.82       | (0.61, 1.12)        | -1.26   | 0.209   |

Donor genotypes

IL-10 915

| Coding | Control Freq | (S.E.)  | Case Freq | (S.E.)  | Coefficient | (S.E.)  | Odds Ratio | Confidence Interval | Z-score | p-value |
|--------|--------------|---------|-----------|---------|-------------|---------|------------|---------------------|---------|---------|
| A      | 0.54018      | (0.023) | 0.51504   | (0.034) |             |         | 1.00       |                     |         |         |
| G      | 0.45982      | (0.023) | 0.48496   | (0.034) | 0.05936     | (0.157) | 1.06       | (0.78, 1.44)        | 0.38    | 0.706   |

\*\*\*\*\*

IL-10 1405

| Coding | Control Freq | (S.E.)  | Case Freq | (S.E.)  | Coefficient | (S.E.)  | Odds Ratio | Confidence Interval | Z-score | p-value |
|--------|--------------|---------|-----------|---------|-------------|---------|------------|---------------------|---------|---------|
| C      | 0.75000      | (0.022) | 0.74046   | (0.028) |             |         | 1.00       |                     |         |         |
| A      | 0.25000      | (0.022) | 0.25954   | (0.028) | 0.11984     | (0.171) | 1.13       | (0.81, 1.58)        | 0.70    | 0.484   |

\*\*\*\*\*

IL-10 3699

| Coding | Control Freq | (S.E.)  | Case Freq | (S.E.)  | Coefficient | (S.E.)  | Odds Ratio | Confidence Interval | Z-score | p-value |
|--------|--------------|---------|-----------|---------|-------------|---------|------------|---------------------|---------|---------|
| A      | 0.76147      | (0.020) | 0.76692   | (0.026) |             |         | 1.00       |                     |         |         |
| T      | 0.23853      | (0.020) | 0.23308   | (0.026) | -0.11725    | (0.195) | 0.89       | (0.61, 1.30)        | -0.60   | 0.547   |

\*\*\*\*\*

IL-10 3843

| Coding | Control Freq | (S.E.)  | Case Freq | (S.E.)  | Coefficient | (S.E.)  | Odds Ratio | Confidence Interval | Z-score | p-value |
|--------|--------------|---------|-----------|---------|-------------|---------|------------|---------------------|---------|---------|
| G      | 0.84318      | (0.016) | 0.81200   | (0.022) |             |         | 1.00       |                     |         |         |
| T      | 0.15682      | (0.016) | 0.18800   | (0.022) | 0.29234     | (0.229) | 1.34       | (0.85, 2.10)        | 1.27    | 0.202   |

\*\*\*\*\*

IL-1B 1274

| Coding | Control Freq | (S.E.)  | Case Freq | (S.E.)  | Coefficient | (S.E.)  | Odds Ratio | Confidence Interval | Z-score | p-value |
|--------|--------------|---------|-----------|---------|-------------|---------|------------|---------------------|---------|---------|
| T      | 0.67778      | (0.022) | 0.66929   | (0.026) |             |         | 1.00       |                     |         |         |
| C      | 0.32222      | (0.022) | 0.33071   | (0.026) | 0.05054     | (0.175) | 1.05       | (0.75, 1.48)        | 0.29    | 0.773   |

\*\*\*\*\*

IL-1B 5200

| Coding | Control Freq | (S.E.)  | Case Freq | (S.E.)  | Coefficient | (S.E.)  | Odds Ratio | Confidence Interval | Z-score | p-value |
|--------|--------------|---------|-----------|---------|-------------|---------|------------|---------------------|---------|---------|
| G      | 0.60000      | (0.022) | 0.65476   | (0.030) |             |         | 1.00       |                     |         |         |
| A      | 0.40000      | (0.022) | 0.34524   | (0.030) | -0.25573    | (0.165) | 0.77       | (0.56, 1.07)        | -1.55   | 0.121   |

\*\*\*\*\*

IL-1B 5277

| Coding | Control Freq | (S.E.)  | Case Freq | (S.E.)  | Coefficient | (S.E.)  | Odds Ratio | Confidence Interval | Z-score | p-value |
|--------|--------------|---------|-----------|---------|-------------|---------|------------|---------------------|---------|---------|
| C      | 0.80942      | (0.019) | 0.75769   | (0.025) |             |         | 1.00       |                     |         |         |
| T      | 0.19058      | (0.019) | 0.24231   | (0.025) | 0.35314     | (0.190) | 1.42       | (0.98, 2.07)        | 1.86    | 0.063   |

\*\*\*\*\*

IL-1B 8234

| Coding | Control Freq | (S.E.)  | Case Freq | (S.E.)  | Coefficient | (S.E.)  | Odds Ratio | Confidence Interval | Z-score | p-value |
|--------|--------------|---------|-----------|---------|-------------|---------|------------|---------------------|---------|---------|
| G      | 0.80269      | (0.019) | 0.75191   | (0.025) |             |         | 1.00       |                     |         |         |
| C      | 0.19731      | (0.019) | 0.24809   | (0.025) | 0.35768     | (0.190) | 1.43       | (0.98, 2.08)        | 1.88    | 0.060   |

\*\*\*\*\*

IL-1rn 1018

| Coding | Control Freq | (S.E.)  | Case Freq | (S.E.)  | Coefficient | (S.E.)  | Odds Ratio | Confidence Interval | Z-score | p-value |
|--------|--------------|---------|-----------|---------|-------------|---------|------------|---------------------|---------|---------|
| T      | 0.61161      | (0.023) | 0.60853   | (0.031) |             |         | 1.00       |                     |         |         |
| C      | 0.38839      | (0.023) | 0.39147   | (0.031) | 0.02257     | (0.161) | 1.02       | (0.75, 1.40)        | 0.14    | 0.888   |

\*\*\*\*\*



IL-lrn 3331

| Coding | Control Freq | (S.E.)  | Case Freq | (S.E.)  | Coefficient | (S.E.)  | Odds Ratio | Confidence Interval | Z-score | p-value |
|--------|--------------|---------|-----------|---------|-------------|---------|------------|---------------------|---------|---------|
| A      | 0.60667      | (0.023) | 0.55426   | (0.032) |             |         | 1.00       |                     |         |         |
| G      | 0.39333      | (0.023) | 0.44574   | (0.032) | 0.19940     | (0.162) | 1.22       | (0.89, 1.68)        | 1.23    | 0.220   |

\*\*\*\*\*

IL-lrn 10257

| Coding | Control Freq | (S.E.)  | Case Freq | (S.E.)  | Coefficient | (S.E.)  | Odds Ratio | Confidence Interval | Z-score | p-value |
|--------|--------------|---------|-----------|---------|-------------|---------|------------|---------------------|---------|---------|
| T      | 0.83710      | (0.018) | 0.88525   | (0.020) |             |         | 1.00       |                     |         |         |
| C      | 0.16290      | (0.018) | 0.11475   | (0.020) | -0.44476    | (0.229) | 0.64       | (0.41, 1.00)        | -1.94   | 0.052   |

\*\*\*\*\*

IL-lrn 13760

| Coding | Control Freq | (S.E.)  | Case Freq | (S.E.)  | Coefficient | (S.E.)  | Odds Ratio | Confidence Interval | Z-score | p-value |
|--------|--------------|---------|-----------|---------|-------------|---------|------------|---------------------|---------|---------|
| T      | 0.74222      | (0.019) | 0.72901   | (0.029) |             |         | 1.00       |                     |         |         |
| C      | 0.25778      | (0.019) | 0.27099   | (0.029) | 0.06130     | (0.192) | 1.06       | (0.73, 1.55)        | 0.32    | 0.749   |

\*\*\*\*\*

IL-lrn 16857

| Coding | Control Freq | (S.E.)  | Case Freq | (S.E.)  | Coefficient | (S.E.)  | Odds Ratio | Confidence Interval | Z-score | p-value |
|--------|--------------|---------|-----------|---------|-------------|---------|------------|---------------------|---------|---------|
| T      | 0.72467      | (0.021) | 0.72519   | (0.028) |             |         | 1.00       |                     |         |         |
| C      | 0.27533      | (0.021) | 0.27481   | (0.028) | 0.00455     | (0.176) | 1.00       | (0.71, 1.42)        | 0.03    | 0.979   |

\*\*\*\*\*

TLR2 1868

| Coding | Control Freq | (S.E.)  | Case Freq | (S.E.)  | Coefficient | (S.E.)  | Odds Ratio | Confidence Interval | Z-score | p-value |
|--------|--------------|---------|-----------|---------|-------------|---------|------------|---------------------|---------|---------|
| A      | 0.64612      | (0.023) | 0.64015   | (0.030) |             |         | 1.00       |                     |         |         |
| G      | 0.35388      | (0.023) | 0.35985   | (0.030) | -0.00988    | (0.157) | 0.99       | (0.73, 1.35)        | -0.06   | 0.950   |

\*\*\*\*\*

TLR2 29886

| Coding | Control Freq | (S.E.)  | Case Freq | (S.E.)  | Coefficient | (S.E.)  | Odds Ratio | Confidence Interval | Z-score | p-value |
|--------|--------------|---------|-----------|---------|-------------|---------|------------|---------------------|---------|---------|
| T      | 0.58705      | (0.023) | 0.55769   | (0.031) |             |         | 1.00       |                     |         |         |
| C      | 0.41295      | (0.023) | 0.44231   | (0.031) | 0.15066     | (0.157) | 1.16       | (0.85, 1.58)        | 0.96    | 0.338   |

\*\*\*\*\*

TLR2 30639

| Coding | Control Freq | (S.E.)  | Case Freq | (S.E.)  | Coefficient | (S.E.)  | Odds Ratio | Confidence Interval | Z-score | p-value |
|--------|--------------|---------|-----------|---------|-------------|---------|------------|---------------------|---------|---------|
| T      | 0.92071      | (0.013) | 0.92803   | (0.017) |             |         | 1.00       |                     |         |         |
| C      | 0.07930      | (0.013) | 0.07197   | (0.017) | -0.13207    | (0.290) | 0.88       | (0.50, 1.55)        | -0.45   | 0.649   |

\*\*\*\*\*

TLR2 31632

| Coding | Control Freq | (S.E.)  | Case Freq | (S.E.)  | Coefficient | (S.E.)  | Odds Ratio | Confidence Interval | Z-score | p-value |
|--------|--------------|---------|-----------|---------|-------------|---------|------------|---------------------|---------|---------|
| G      | 0.98451      | (0.007) | 0.98462   | (0.009) |             |         | 1.00       |                     |         |         |
| A      | 0.01549      | (0.007) | 0.01538   | (0.009) | -0.02336    | (0.541) | 0.98       | (0.34, 2.82)        | -0.04   | 0.966   |

\*\*\*\*\*

TLR3 18917

| Coding | Control Freq | (S.E.)  | Case Freq | (S.E.)  | Coefficient | (S.E.)  | Odds Ratio | Confidence Interval | Z-score | p-value |
|--------|--------------|---------|-----------|---------|-------------|---------|------------|---------------------|---------|---------|
| C      | 0.84061      | (0.017) | 0.86364   | (0.020) |             |         | 1.00       |                     |         |         |
| T      | 0.15939      | (0.017) | 0.13636   | (0.020) | -0.25018    | (0.231) | 0.78       | (0.50, 1.22)        | -1.08   | 0.278   |

\*\*\*\*\*

TLR3 19028

| Coding | Control Freq | (S.E.)  | Case Freq | (S.E.)  | Coefficient | (S.E.)  | Odds Ratio | Confidence Interval | Z-score | p-value |
|--------|--------------|---------|-----------|---------|-------------|---------|------------|---------------------|---------|---------|
| C      | 0.81306      | (0.017) | 0.79546   | (0.023) |             |         | 1.00       |                     |         |         |
| T      | 0.18694      | (0.017) | 0.20455   | (0.023) | 0.14120     | (0.219) | 1.15       | (0.75, 1.77)        | 0.65    | 0.518   |

\*\*\*\*\*

TLR3 22793

| Coding | Control Freq | (S.E.)  | Case Freq | (S.E.)  | Coefficient | (S.E.) | Odds Ratio | Confidence Interval | Z-score | p-value |
|--------|--------------|---------|-----------|---------|-------------|--------|------------|---------------------|---------|---------|
| C      | 0.69469      | (0.022) | 0.71374   | (0.027) |             |        | 1.00       |                     |         |         |

T 0.30531 (0.022) 0.28626 (0.027) -0.05389 (0.168) 0.95 (0.68, 1.32) -0.32 0.749

\*\*\*\*\*

TLR6 1166

| Coding | Control Freq | (S.E.)  | Case Freq | (S.E.)  | Coefficient | (S.E.)  | Odds Ratio | Confidence Interval | Z-score | p-value |
|--------|--------------|---------|-----------|---------|-------------|---------|------------|---------------------|---------|---------|
| G      | 0.80134      | (0.019) | 0.78077   | (0.023) |             |         | 1.00       |                     |         |         |
| A      | 0.19866      | (0.019) | 0.21923   | (0.023) | 0.09163     | (0.192) | 1.10       | (0.75, 1.60)        | 0.48    | 0.633   |

\*\*\*\*\*

TLR6 2065

| Coding | Control Freq | (S.E.)  | Case Freq | (S.E.)  | Coefficient | (S.E.)  | Odds Ratio | Confidence Interval | Z-score | p-value |
|--------|--------------|---------|-----------|---------|-------------|---------|------------|---------------------|---------|---------|
| T      | 0.55752      | (0.023) | 0.53409   | (0.032) |             |         | 1.00       |                     |         |         |
| C      | 0.44248      | (0.023) | 0.46591   | (0.032) | 0.11829     | (0.161) | 1.13       | (0.82, 1.54)        | 0.73    | 0.463   |

\*\*\*\*\*

TLR6 3649

| Coding | Control Freq | (S.E.)  | Case Freq | (S.E.)  | Coefficient | (S.E.)  | Odds Ratio | Confidence Interval | Z-score | p-value |
|--------|--------------|---------|-----------|---------|-------------|---------|------------|---------------------|---------|---------|
| C      | 0.64912      | (0.021) | 0.68421   | (0.028) |             |         | 1.00       |                     |         |         |
| G      | 0.35088      | (0.021) | 0.31579   | (0.028) | -0.19368    | (0.176) | 0.82       | (0.58, 1.16)        | -1.10   | 0.272   |

\*\*\*\*\*

CD14 4051

| Coding | Control Freq | (S.E.)  | Case Freq | (S.E.)  | Coefficient | (S.E.)  | Odds Ratio | Confidence Interval | Z-score | p-value |
|--------|--------------|---------|-----------|---------|-------------|---------|------------|---------------------|---------|---------|
| T      | 0.74545      | (0.020) | 0.74809   | (0.025) |             |         | 1.00       |                     |         |         |
| A      | 0.25455      | (0.020) | 0.25191   | (0.025) | -0.03535    | (0.191) | 0.97       | (0.66, 1.40)        | -0.19   | 0.853   |

\*\*\*\*\*

CD14 4488

| Coding | Control Freq | (S.E.)  | Case Freq | (S.E.)  | Coefficient | (S.E.)  | Odds Ratio | Confidence Interval | Z-score | p-value |
|--------|--------------|---------|-----------|---------|-------------|---------|------------|---------------------|---------|---------|
| C      | 0.72174      | (0.022) | 0.73864   | (0.025) |             |         | 1.00       |                     |         |         |
| T      | 0.27826      | (0.022) | 0.26136   | (0.025) | -0.07730    | (0.175) | 0.93       | (0.66, 1.31)        | -0.44   | 0.659   |

\*\*\*\*\*

CD14 7066

| Coding | Control Freq | (S.E.)  | Case Freq | (S.E.)  | Coefficient | (S.E.)  | Odds Ratio | Confidence Interval | Z-score | p-value |
|--------|--------------|---------|-----------|---------|-------------|---------|------------|---------------------|---------|---------|
| C      | 0.55882      | (0.021) | 0.53759   | (0.030) |             |         | 1.00       |                     |         |         |
| T      | 0.44118      | (0.021) | 0.46241   | (0.030) | 0.10659     | (0.168) | 1.11       | (0.80, 1.55)        | 0.63    | 0.526   |

\*\*\*\*\*

CD14 8514

| Coding | Control Freq | (S.E.)  | Case Freq | (S.E.)  | Coefficient | (S.E.)  | Odds Ratio | Confidence Interval | Z-score | p-value |
|--------|--------------|---------|-----------|---------|-------------|---------|------------|---------------------|---------|---------|
| G      | 0.88597      | (0.014) | 0.90151   | (0.019) |             |         | 1.00       |                     |         |         |
| C      | 0.11404      | (0.014) | 0.09849   | (0.019) | -0.07379    | (0.258) | 0.93       | (0.56, 1.54)        | -0.29   | 0.775   |

\*\*\*\*\*

tnf 282

| Coding | Control Freq | (S.E.)  | Case Freq | (S.E.)  | Coefficient | (S.E.)  | Odds Ratio | Confidence Interval | Z-score | p-value |
|--------|--------------|---------|-----------|---------|-------------|---------|------------|---------------------|---------|---------|
| G      | 0.85778      | (0.017) | 0.86364   | (0.020) |             |         | 1.00       |                     |         |         |
| A      | 0.14222      | (0.017) | 0.13636   | (0.020) | -0.15661    | (0.217) | 0.86       | (0.56, 1.31)        | -0.72   | 0.470   |

\*\*\*\*\*

tnf 352

| Coding | Control Freq | (S.E.)  | Case Freq | (S.E.)  | Coefficient | (S.E.)  | Odds Ratio | Confidence Interval | Z-score | p-value |
|--------|--------------|---------|-----------|---------|-------------|---------|------------|---------------------|---------|---------|
| G      | 0.94912      | (0.010) | 0.93561   | (0.016) |             |         | 1.00       |                     |         |         |
| A      | 0.05089      | (0.010) | 0.06439   | (0.016) | 0.36799     | (0.309) | 1.44       | (0.79, 2.65)        | 1.19    | 0.234   |

\*\*\*\*\*

tnf 1009

| Coding | Control Freq | (S.E.)  | Case Freq | (S.E.)  | Coefficient | (S.E.)  | Odds Ratio | Confidence Interval | Z-score | p-value |
|--------|--------------|---------|-----------|---------|-------------|---------|------------|---------------------|---------|---------|
| G      | 0.97917      | (0.006) | 0.97967   | (0.008) |             |         | 1.00       |                     |         |         |
| A      | 0.02083      | (0.006) | 0.02032   | (0.008) | 0.14797     | (0.588) | 1.16       | (0.37, 3.67)        | 0.25    | 0.801   |

\*\*\*\*\*

tnf 4101

| Coding | Control Freq | (S.E.)  | Case Freq | (S.E.)  | Coefficient | (S.E.)  | Odds Ratio | Confidence Interval | Z-score | p-value |
|--------|--------------|---------|-----------|---------|-------------|---------|------------|---------------------|---------|---------|
| G      | 0.90044      | (0.014) | 0.91288   | (0.016) |             |         | 1.00       |                     |         |         |
| A      | 0.09956      | (0.014) | 0.08712   | (0.016) | -0.25647    | (0.270) | 0.77       | (0.46, 1.31)        | -0.95   | 0.342   |

\*\*\*\*\*

IL-6 321

| Coding | Control Freq | (S.E.)  | Case Freq | (S.E.)  | Coefficient | (S.E.)  | Odds Ratio | Confidence Interval | Z-score | p-value |
|--------|--------------|---------|-----------|---------|-------------|---------|------------|---------------------|---------|---------|
| G      | 0.91304      | (0.012) | 0.90625   | (0.018) |             |         | 1.00       |                     |         |         |
| T      | 0.08696      | (0.012) | 0.09375   | (0.018) | 0.08742     | (0.285) | 1.09       | (0.62, 1.91)        | 0.31    | 0.759   |

\*\*\*\*\*

IL-6 1510

| Coding | Control Freq | (S.E.)  | Case Freq | (S.E.)  | Coefficient | (S.E.)  | Odds Ratio | Confidence Interval | Z-score | p-value |
|--------|--------------|---------|-----------|---------|-------------|---------|------------|---------------------|---------|---------|
| G      | 0.59728      | (0.023) | 0.60077   | (0.030) |             |         | 1.00       |                     |         |         |
| C      | 0.40271      | (0.023) | 0.39923   | (0.030) | -0.09555    | (0.161) | 0.91       | (0.66, 1.25)        | -0.59   | 0.554   |

\*\*\*\*\*

IL-6 3437

| Coding | Control Freq | (S.E.)  | Case Freq | (S.E.)  | Coefficient | (S.E.)  | Odds Ratio | Confidence Interval | Z-score | p-value |
|--------|--------------|---------|-----------|---------|-------------|---------|------------|---------------------|---------|---------|
| C      | 0.70395      | (0.023) | 0.68321   | (0.028) |             |         | 1.00       |                     |         |         |
| G      | 0.29605      | (0.023) | 0.31679   | (0.028) | 0.19090     | (0.170) | 1.21       | (0.87, 1.69)        | 1.12    | 0.263   |

\*\*\*\*\*

TLR4 851

| Coding | Control Freq | (S.E.)  | Case Freq | (S.E.)  | Coefficient | (S.E.)  | Odds Ratio | Confidence Interval | Z-score | p-value |
|--------|--------------|---------|-----------|---------|-------------|---------|------------|---------------------|---------|---------|
| A      | 0.72430      | (0.020) | 0.73047   | (0.028) |             |         | 1.00       |                     |         |         |
| G      | 0.27570      | (0.020) | 0.26953   | (0.028) | 0.01131     | (0.182) | 1.01       | (0.71, 1.44)        | 0.06    | 0.950   |

\*\*\*\*\*

TLR4 1859

| Coding | Control Freq | (S.E.)  | Case Freq | (S.E.)  | Coefficient | (S.E.)  | Odds Ratio | Confidence Interval | Z-score | p-value |
|--------|--------------|---------|-----------|---------|-------------|---------|------------|---------------------|---------|---------|
| G      | 0.59677      | (0.022) | 0.61923   | (0.030) |             |         | 1.00       |                     |         |         |
| A      | 0.40323      | (0.022) | 0.38077   | (0.030) | -0.06616    | (0.162) | 0.94       | (0.68, 1.29)        | -0.41   | 0.684   |

\*\*\*\*\*

TLR4 1893

| Coding | Control Freq | (S.E.)  | Case Freq | (S.E.)  | Coefficient | (S.E.)  | Odds Ratio | Confidence Interval | Z-score | p-value |
|--------|--------------|---------|-----------|---------|-------------|---------|------------|---------------------|---------|---------|
| A      | 0.68444      | (0.023) | 0.65151   | (0.029) |             |         | 1.00       |                     |         |         |
| G      | 0.31556      | (0.023) | 0.34848   | (0.029) | 0.06909     | (0.160) | 1.07       | (0.78, 1.47)        | 0.43    | 0.666   |

\*\*\*\*\*

TLR4 2856

| Coding | Control Freq | (S.E.)  | Case Freq | (S.E.)  | Coefficient | (S.E.)  | Odds Ratio | Confidence Interval | Z-score | p-value |
|--------|--------------|---------|-----------|---------|-------------|---------|------------|---------------------|---------|---------|
| T      | 0.86916      | (0.017) | 0.85115   | (0.020) |             |         | 1.00       |                     |         |         |
| C      | 0.13084      | (0.017) | 0.14885   | (0.020) | 0.09572     | (0.230) | 1.10       | (0.70, 1.73)        | 0.42    | 0.677   |

\*\*\*\*\*

TLR4 9263

| Coding | Control Freq | (S.E.)  | Case Freq | (S.E.)  | Coefficient | (S.E.)  | Odds Ratio | Confidence Interval | Z-score | p-value |
|--------|--------------|---------|-----------|---------|-------------|---------|------------|---------------------|---------|---------|
| C      | 0.86842      | (0.015) | 0.88258   | (0.019) |             |         | 1.00       |                     |         |         |
| A      | 0.13158      | (0.015) | 0.11742   | (0.019) | -0.24726    | (0.250) | 0.78       | (0.48, 1.27)        | -0.99   | 0.322   |

\*\*\*\*\*

TLR4 13015

| Coding | Control Freq | (S.E.)  | Case Freq | (S.E.)  | Coefficient | (S.E.)  | Odds Ratio | Confidence Interval | Z-score | p-value |
|--------|--------------|---------|-----------|---------|-------------|---------|------------|---------------------|---------|---------|
| A      | 0.96681      | (0.008) | 0.93985   | (0.015) |             |         | 1.00       |                     |         |         |
| G      | 0.03319      | (0.008) | 0.06015   | (0.015) | 0.66090     | (0.382) | 1.94       | (0.92, 4.09)        | 1.73    | 0.084   |

\*\*\*\*\*

TLR4 15844

| Coding | Control Freq | (S.E.)  | Case Freq | (S.E.)  | Coefficient | (S.E.)  | Odds Ratio | Confidence Interval | Z-score | p-value |
|--------|--------------|---------|-----------|---------|-------------|---------|------------|---------------------|---------|---------|
| G      | 0.86784      | (0.016) | 0.86090   | (0.022) |             |         | 1.00       |                     |         |         |
| C      | 0.13216      | (0.016) | 0.13910   | (0.022) | 0.13415     | (0.225) | 1.14       | (0.74, 1.78)        | 0.60    | 0.551   |

\*\*\*\*\*

TLR4 16649

| Coding | Control | (S.E.)  | Case    | (S.E.)  | Coefficient | (S.E.)  | Odds  | Confidence   | Z-score | p-value |
|--------|---------|---------|---------|---------|-------------|---------|-------|--------------|---------|---------|
|        | Freq    |         | Freq    |         |             |         | Ratio | Interval     |         |         |
| G      | 0.83705 | (0.018) | 0.83835 | (0.024) |             |         | 1.00  |              |         |         |
| C      | 0.16295 | (0.018) | 0.16165 | (0.024) | -0.10077    | (0.208) | 0.90  | (0.60, 1.36) | -0.49   | 0.627   |

\*\*\*\*\*

tirap 154

| Coding | Control | (S.E.)  | Case    | (S.E.)  | Coefficient | (S.E.)  | Odds  | Confidence   | Z-score | p-value |
|--------|---------|---------|---------|---------|-------------|---------|-------|--------------|---------|---------|
|        | Freq    |         | Freq    |         |             |         | Ratio | Interval     |         |         |
| G      | 0.74009 | (0.020) | 0.79323 | (0.024) |             |         | 1.00  |              |         |         |
| C      | 0.25991 | (0.020) | 0.20677 | (0.024) | -0.31659    | (0.193) | 0.73  | (0.50, 1.06) | -1.64   | 0.101   |

\*\*\*\*\*

tirap 1750

| Coding | Control | (S.E.)  | Case    | (S.E.)  | Coefficient | (S.E.)  | Odds  | Confidence   | Z-score | p-value |
|--------|---------|---------|---------|---------|-------------|---------|-------|--------------|---------|---------|
|        | Freq    |         | Freq    |         |             |         | Ratio | Interval     |         |         |
| C      | 0.75109 | (0.021) | 0.77068 | (0.026) |             |         | 1.00  |              |         |         |
| G      | 0.24891 | (0.021) | 0.22932 | (0.026) | -0.12718    | (0.182) | 0.88  | (0.62, 1.26) | -0.70   | 0.484   |

\*\*\*\*\*

tirap 9537

| Coding | Control | (S.E.)  | Case    | (S.E.)  | Coefficient | (S.E.)  | Odds  | Confidence   | Z-score | p-value |
|--------|---------|---------|---------|---------|-------------|---------|-------|--------------|---------|---------|
|        | Freq    |         | Freq    |         |             |         | Ratio | Interval     |         |         |
| T      | 0.57017 | (0.024) | 0.60985 | (0.029) |             |         | 1.00  |              |         |         |
| C      | 0.42983 | (0.024) | 0.39015 | (0.029) | -0.19147    | (0.158) | 0.83  | (0.61, 1.13) | -1.21   | 0.226   |

\*\*\*\*\*

tirap 13110

| Coding | Control | (S.E.)  | Case    | (S.E.)  | Coefficient | (S.E.)  | Odds  | Confidence   | Z-score | p-value |
|--------|---------|---------|---------|---------|-------------|---------|-------|--------------|---------|---------|
|        | Freq    |         | Freq    |         |             |         | Ratio | Interval     |         |         |
| G      | 0.84932 | (0.017) | 0.83969 | (0.023) |             |         | 1.00  |              |         |         |
| A      | 0.15069 | (0.017) | 0.16031 | (0.023) | 0.04707     | (0.215) | 1.05  | (0.69, 1.60) | 0.22    | 0.827   |

\*\*\*\*\*

tirap 13365

| Coding | Control | (S.E.)  | Case    | (S.E.)  | Coefficient | (S.E.)  | Odds  | Confidence   | Z-score | p-value |
|--------|---------|---------|---------|---------|-------------|---------|-------|--------------|---------|---------|
|        | Freq    |         | Freq    |         |             |         | Ratio | Interval     |         |         |
| C      | 0.77293 | (0.022) | 0.74060 | (0.030) |             |         | 1.00  |              |         |         |
| T      | 0.22707 | (0.022) | 0.25940 | (0.030) | 0.11118     | (0.162) | 1.12  | (0.81, 1.54) | 0.69    | 0.493   |

\*\*\*\*\*

traf6 1893

| Coding | Control | (S.E.)  | Case    | (S.E.)  | Coefficient | (S.E.)  | Odds  | Confidence   | Z-score | p-value |
|--------|---------|---------|---------|---------|-------------|---------|-------|--------------|---------|---------|
|        | Freq    |         | Freq    |         |             |         | Ratio | Interval     |         |         |
| G      | 0.87445 | (0.015) | 0.89850 | (0.020) |             |         | 1.00  |              |         |         |
| A      | 0.12555 | (0.015) | 0.10150 | (0.020) | -0.28942    | (0.265) | 0.75  | (0.45, 1.26) | -1.09   | 0.275   |

\*\*\*\*\*

traf6 8015

| Coding | Control | (S.E.)  | Case    | (S.E.)  | Coefficient | (S.E.)  | Odds  | Confidence   | Z-score | p-value |
|--------|---------|---------|---------|---------|-------------|---------|-------|--------------|---------|---------|
|        | Freq    |         | Freq    |         |             |         | Ratio | Interval     |         |         |
| T      | 0.88222 | (0.015) | 0.87209 | (0.020) |             |         | 1.00  |              |         |         |
| C      | 0.11778 | (0.015) | 0.12791 | (0.020) | 0.04213     | (0.246) | 1.04  | (0.64, 1.69) | 0.17    | 0.864   |

\*\*\*\*\*

traf6 17551

| Coding | Control | (S.E.)  | Case    | (S.E.)  | Coefficient | (S.E.)  | Odds  | Confidence   | Z-score | p-value |
|--------|---------|---------|---------|---------|-------------|---------|-------|--------------|---------|---------|
|        | Freq    |         | Freq    |         |             |         | Ratio | Interval     |         |         |
| A      | 0.62329 | (0.023) | 0.62977 | (0.031) |             |         | 1.00  |              |         |         |
| C      | 0.37671 | (0.023) | 0.37023 | (0.031) | -0.05670    | (0.155) | 0.94  | (0.70, 1.28) | -0.36   | 0.715   |

\*\*\*\*\*

irak4 133

| Coding | Control | (S.E.)  | Case    | (S.E.)  | Coefficient | (S.E.)  | Odds  | Confidence    | Z-score | p-value |
|--------|---------|---------|---------|---------|-------------|---------|-------|---------------|---------|---------|
|        | Freq    |         | Freq    |         |             |         | Ratio | Interval      |         |         |
| G      | 0.50917 | (0.005) | 0.50000 | (0.005) |             |         | 1.00  |               |         |         |
| A      | 0.49083 | (0.005) | 0.50000 | (0.005) | 1.09234     | (0.892) | 2.98  | (0.52, 17.12) | 1.22    | 0.221   |

\*\*\*\*\*

irak4 13823

| Coding | Control Freq | (S.E.)  | Case Freq | (S.E.)  | Coefficient | (S.E.)  | Odds Ratio | Confidence Interval | Z-score | p-value |
|--------|--------------|---------|-----------|---------|-------------|---------|------------|---------------------|---------|---------|
| G      | 0.74229      | (0.021) | 0.75191   | (0.027) |             |         | 1.00       |                     |         |         |
| A      | 0.25771      | (0.021) | 0.24809   | (0.027) | -0.02889    | (0.177) | 0.97       | (0.69, 1.37)        | -0.16   | 0.870   |

\*\*\*\*\*

irak4 23338

| Coding | Control Freq | (S.E.)  | Case Freq | (S.E.)  | Coefficient | (S.E.)  | Odds Ratio | Confidence Interval | Z-score | p-value |
|--------|--------------|---------|-----------|---------|-------------|---------|------------|---------------------|---------|---------|
| G      | 0.52423      | (0.023) | 0.50379   | (0.032) |             |         | 1.00       |                     |         |         |
| C      | 0.47577      | (0.023) | 0.49621   | (0.032) | 0.08416     | (0.160) | 1.09       | (0.79, 1.49)        | 0.52    | 0.600   |

\*\*\*\*\*

bpi 2738

| Coding | Control Freq | (S.E.)  | Case Freq | (S.E.)  | Coefficient | (S.E.)  | Odds Ratio | Confidence Interval | Z-score | p-value |
|--------|--------------|---------|-----------|---------|-------------|---------|------------|---------------------|---------|---------|
| C      | 0.80000      | (0.019) | 0.75969   | (0.025) |             |         | 1.00       |                     |         |         |
| G      | 0.20000      | (0.019) | 0.24031   | (0.025) | 0.21174     | (0.194) | 1.24       | (0.85, 1.81)        | 1.09    | 0.274   |

\*\*\*\*\*

bpi 7258

| Coding | Control Freq | (S.E.)  | Case Freq | (S.E.)  | Coefficient | (S.E.)  | Odds Ratio | Confidence Interval | Z-score | p-value |
|--------|--------------|---------|-----------|---------|-------------|---------|------------|---------------------|---------|---------|
| G      | 0.57080      | (0.023) | 0.53759   | (0.032) |             |         | 1.00       |                     |         |         |
| A      | 0.42920      | (0.023) | 0.46241   | (0.032) | 0.07468     | (0.161) | 1.08       | (0.79, 1.48)        | 0.46    | 0.642   |

\*\*\*\*\*

bpi 9083

| Coding | Control Freq | (S.E.)  | Case Freq | (S.E.)  | Coefficient | (S.E.)  | Odds Ratio | Confidence Interval | Z-score | p-value |
|--------|--------------|---------|-----------|---------|-------------|---------|------------|---------------------|---------|---------|
| G      | 0.90870      | (0.013) | 0.87879   | (0.019) |             |         | 1.00       |                     |         |         |
| C      | 0.09130      | (0.013) | 0.12121   | (0.019) | 0.42927     | (0.267) | 1.54       | (0.91, 2.59)        | 1.61    | 0.107   |

\*\*\*\*\*

bpi 10214

| Coding | Control Freq | (S.E.)  | Case Freq | (S.E.)  | Coefficient | (S.E.)  | Odds Ratio | Confidence Interval | Z-score | p-value |
|--------|--------------|---------|-----------|---------|-------------|---------|------------|---------------------|---------|---------|
| A      | 0.88326      | (0.015) | 0.89015   | (0.018) |             |         | 1.00       |                     |         |         |
| G      | 0.11674      | (0.015) | 0.10985   | (0.018) | -0.00335    | (0.251) | 1.00       | (0.61, 1.63)        | -0.01   | 0.989   |

\*\*\*\*\*

bpi 17016

| Coding | Control Freq | (S.E.)  | Case Freq | (S.E.)  | Coefficient | (S.E.)  | Odds Ratio | Confidence Interval | Z-score | p-value |
|--------|--------------|---------|-----------|---------|-------------|---------|------------|---------------------|---------|---------|
| G      | 0.53829      | (0.023) | 0.57308   | (0.032) |             |         | 1.00       |                     |         |         |
| A      | 0.46171      | (0.023) | 0.42692   | (0.032) | -0.12931    | (0.165) | 0.88       | (0.64, 1.21)        | -0.79   | 0.432   |

\*\*\*\*\*

bpi 23356

| Coding | Control Freq | (S.E.)  | Case Freq | (S.E.)  | Coefficient | (S.E.)  | Odds Ratio | Confidence Interval | Z-score | p-value |
|--------|--------------|---------|-----------|---------|-------------|---------|------------|---------------------|---------|---------|
| C      | 0.62500      | (0.022) | 0.68045   | (0.029) |             |         | 1.00       |                     |         |         |
| T      | 0.37500      | (0.022) | 0.31955   | (0.029) | -0.24129    | (0.173) | 0.79       | (0.56, 1.10)        | -1.40   | 0.162   |

\*\*\*\*\*

bpi 33065

| Coding | Control Freq | (S.E.)  | Case Freq | (S.E.)  | Coefficient | (S.E.)  | Odds Ratio | Confidence Interval | Z-score | p-value |
|--------|--------------|---------|-----------|---------|-------------|---------|------------|---------------------|---------|---------|
| G      | 0.50664      | (0.024) | 0.42481   | (0.031) |             |         | 1.00       |                     |         |         |
| A      | 0.49336      | (0.024) | 0.57519   | (0.031) | 0.26972     | (0.155) | 1.31       | (0.97, 1.77)        | 1.74    | 0.082   |

\*\*\*\*\*

bpi 36045

| Coding | Control Freq | (S.E.)  | Case Freq | (S.E.)  | Coefficient | (S.E.)  | Odds Ratio | Confidence Interval | Z-score | p-value |
|--------|--------------|---------|-----------|---------|-------------|---------|------------|---------------------|---------|---------|
| G      | 0.64097      | (0.021) | 0.53759   | (0.033) |             |         | 1.00       |                     |         |         |
| A      | 0.35903      | (0.021) | 0.46241   | (0.033) | 0.44324     | (0.166) | 1.56       | (1.13, 2.16)        | 2.67    | 0.008   |

\*\*\*\*\*

lbp 541

| Coding | Control Freq | (S.E.)  | Case Freq | (S.E.)  | Coefficient | (S.E.)  | Odds Ratio | Confidence Interval | Z-score | p-value |
|--------|--------------|---------|-----------|---------|-------------|---------|------------|---------------------|---------|---------|
| C      | 0.65939      | (0.021) | 0.57143   | (0.032) |             |         | 1.00       |                     |         |         |
| T      | 0.34061      | (0.021) | 0.42857   | (0.032) | 0.39086     | (0.164) | 1.48       | (1.07, 2.04)        | 2.38    | 0.017   |

\*\*\*\*\*

lbp 1598

| Coding | Control Freq | (S.E.)  | Case Freq | (S.E.)  | Coefficient | (S.E.)  | Odds Ratio | Confidence Interval | Z-score | p-value |
|--------|--------------|---------|-----------|---------|-------------|---------|------------|---------------------|---------|---------|
| A      | 0.87168      | (0.015) | 0.87698   | (0.020) |             |         | 1.00       |                     |         |         |
| T      | 0.12832      | (0.015) | 0.12302   | (0.020) | -0.11389    | (0.269) | 0.89       | (0.53, 1.51)        | -0.42   | 0.672   |

\*\*\*\*\*

lbp 1756

| Coding | Control Freq | (S.E.)  | Case Freq | (S.E.)  | Coefficient | (S.E.)  | Odds Ratio | Confidence Interval | Z-score | p-value |
|--------|--------------|---------|-----------|---------|-------------|---------|------------|---------------------|---------|---------|
| A      | 0.86364      | (0.016) | 0.85769   | (0.022) |             |         | 1.00       |                     |         |         |
| G      | 0.13636      | (0.016) | 0.14231   | (0.022) | 0.02550     | (0.226) | 1.03       | (0.66, 1.60)        | 0.11    | 0.910   |

\*\*\*\*\*

lbp 5584

| Coding | Control Freq | (S.E.)  | Case Freq | (S.E.)  | Coefficient | (S.E.)  | Odds Ratio | Confidence Interval | Z-score | p-value |
|--------|--------------|---------|-----------|---------|-------------|---------|------------|---------------------|---------|---------|
| G      | 0.93902      | (0.011) | 0.96218   | (0.011) |             |         | 1.00       |                     |         |         |
| A      | 0.06098      | (0.011) | 0.03782   | (0.011) | -0.42559    | (0.399) | 0.65       | (0.30, 1.43)        | -1.07   | 0.286   |

\*\*\*\*\*

lbp 7400

| Coding | Control Freq | (S.E.)  | Case Freq | (S.E.)  | Coefficient | (S.E.)  | Odds Ratio | Confidence Interval | Z-score | p-value |
|--------|--------------|---------|-----------|---------|-------------|---------|------------|---------------------|---------|---------|
| T      | 0.54867      | (0.024) | 0.48855   | (0.031) |             |         | 1.00       |                     |         |         |
| C      | 0.45133      | (0.024) | 0.51145   | (0.031) | 0.24445     | (0.155) | 1.28       | (0.94, 1.73)        | 1.58    | 0.115   |

\*\*\*\*\*

lbp 13506

| Coding | Control Freq | (S.E.)  | Case Freq | (S.E.)  | Coefficient | (S.E.)  | Odds Ratio | Confidence Interval | Z-score | p-value |
|--------|--------------|---------|-----------|---------|-------------|---------|------------|---------------------|---------|---------|
| G      | 0.93450      | (0.012) | 0.91732   | (0.017) |             |         | 1.00       |                     |         |         |
| T      | 0.06550      | (0.012) | 0.08268   | (0.017) | 0.36242     | (0.297) | 1.44       | (0.80, 2.57)        | 1.22    | 0.223   |

\*\*\*\*\*

lbp 17002

| Coding | Control Freq | (S.E.)  | Case Freq | (S.E.)  | Coefficient | (S.E.)  | Odds Ratio | Confidence Interval | Z-score | p-value |
|--------|--------------|---------|-----------|---------|-------------|---------|------------|---------------------|---------|---------|
| A      | 0.50661      | (0.024) | 0.54546   | (0.030) |             |         | 1.00       |                     |         |         |
| G      | 0.49339      | (0.024) | 0.45454   | (0.030) | -0.18779    | (0.156) | 0.83       | (0.61, 1.13)        | -1.20   | 0.229   |

\*\*\*\*\*

lbp 25276

| Coding | Control Freq | (S.E.)  | Case Freq | (S.E.)  | Coefficient | (S.E.)  | Odds Ratio | Confidence Interval | Z-score | p-value |
|--------|--------------|---------|-----------|---------|-------------|---------|------------|---------------------|---------|---------|
| C      | 0.94105      | (0.011) | 0.92424   | (0.016) |             |         | 1.00       |                     |         |         |
| T      | 0.05895      | (0.011) | 0.07576   | (0.016) | 0.41780     | (0.317) | 1.52       | (0.82, 2.83)        | 1.32    | 0.188   |

\*\*\*\*\*

lbp 28559

| Coding | Control Freq | (S.E.)  | Case Freq | (S.E.)  | Coefficient | (S.E.)  | Odds Ratio | Confidence Interval | Z-score | p-value |
|--------|--------------|---------|-----------|---------|-------------|---------|------------|---------------------|---------|---------|
| T      | 0.94222      | (0.010) | 0.94167   | (0.013) |             |         | 1.00       |                     |         |         |
| A      | 0.05778      | (0.010) | 0.05833   | (0.013) | -0.09614    | (0.374) | 0.91       | (0.44, 1.89)        | -0.26   | 0.797   |

\*\*\*\*\*

lbp 33158

| Coding | Control Freq | (S.E.)  | Case Freq | (S.E.)  | Coefficient | (S.E.)  | Odds Ratio | Confidence Interval | Z-score | p-value |
|--------|--------------|---------|-----------|---------|-------------|---------|------------|---------------------|---------|---------|
| C      | 0.58920      | (0.024) | 0.60769   | (0.031) |             |         | 1.00       |                     |         |         |
| T      | 0.41080      | (0.024) | 0.39231   | (0.031) | -0.10979    | (0.157) | 0.90       | (0.66, 1.22)        | -0.70   | 0.485   |
