# Supplementary material
Source: PubMed Central journal article supplement (PMC1895720)
Supplement: blood_2005-06-2338_3.pdf [file blood_2005-06-2338_3.pdf]

## Patient haplotypes

## IL-10

| Haplotype | Coding | Control Freq | (S.E.)  | Case Freq | (S.E.)  | Coefficient | (S.E.)  | Odds Ratio | Confidence Interval | Z-score | p-value |
|-----------|--------|--------------|---------|-----------|---------|-------------|---------|------------|---------------------|---------|---------|
| 1) 0000   | ACAG   | 0.30383      | (0.022) | 0.27201   | (0.026) |             |         | 1.00       |                     |         |         |
| 2) 0100   | AAAG   | 0.27400      | (0.020) | 0.24039   | (0.026) | -0.00636    | (0.228) | 0.99       | (0.64, 1.55)        | -0.03   | 0.978   |
| 3) 1010   | GCTG   | 0.22940      | (0.020) | 0.25430   | (0.032) | 0.21097     | (0.227) | 1.23       | (0.79, 1.93)        | 0.93    | 0.353   |
| 4) 1001   | GCAT   | 0.12902      | (0.015) | 0.15376   | (0.025) | 0.25909     | (0.262) | 1.30       | (0.77, 2.17)        | 0.99    | 0.323   |
| 5) 1000   | GCAG   | 0.05640      | (0.012) | 0.07510   | (0.016) | 0.42318     | (0.334) | 1.53       | (0.79, 2.94)        | 1.27    | 0.205   |

\*\*\*\*\*

## IL-1b

| Haplotype | Coding | Control Freq | (S.E.)  | Case Freq | (S.E.)  | Coefficient | (S.E.)  | Odds Ratio | Confidence Interval | Z-score | p-value |
|-----------|--------|--------------|---------|-----------|---------|-------------|---------|------------|---------------------|---------|---------|
| 1) 0100   | TACG   | 0.32765      | (0.030) | 0.33436   | (0.043) |             |         | 1.00       |                     |         |         |
| 2) 1000   | CGCG   | 0.30457      | (0.021) | 0.31872   | (0.022) | 0.01869     | (0.201) | 1.02       | (0.69, 1.51)        | 0.09    | 0.926   |
| 3) 0011   | TGTC   | 0.12836      | (0.016) | 0.14243   | (0.032) | -0.49479    | (0.236) | 0.61       | (0.38, 0.97)        | -2.10   | 0.036   |
| 4) 0000   | TGCG   | 0.10969      | (0.015) | 0.16344   | (0.024) | 0.35396     | (0.241) | 1.42       | (0.89, 2.28)        | 1.47    | 0.142   |
| 5) 1011   | CGTC   | 0.02166      | (0.017) | 0.01547   | (0.022) | -0.56837    | (0.763) | 0.57       | (0.13, 2.53)        | -0.75   | 0.456   |
| 6) 1100   | CACG   | 0.01239      | (0.044) | 0.02558   | (0.021) | 0.66031     | (0.788) | 1.94       | (0.41, 9.07)        | 0.84    | 0.402   |

\*\*\*\*\*

## IL-1rn

| Haplotype | Coding | Control Freq | (S.E.)  | Case Freq | (S.E.)  | Coefficient | (S.E.)  | Odds Ratio | Confidence Interval | Z-score | p-value |
|-----------|--------|--------------|---------|-----------|---------|-------------|---------|------------|---------------------|---------|---------|
| 1) 10000  | CATT   | 0.36626      | (0.025) | 0.37510   | (0.029) |             |         | 1.00       |                     |         |         |
| 2) 01010  | TGTCT  | 0.23031      | (0.019) | 0.24046   | (0.027) | 0.04479     | (0.207) | 1.05       | (0.70, 1.57)        | 0.22    | 0.829   |
| 3) 01001  | TGTC   | 0.13801      | (0.016) | 0.11243   | (0.020) | -0.22737    | (0.262) | 0.80       | (0.48, 1.33)        | -0.87   | 0.385   |
| 4) 00101  | TACTC  | 0.12807      | (0.015) | 0.10342   | (0.021) | -0.15112    | (0.264) | 0.86       | (0.51, 1.44)        | -0.57   | 0.568   |
| 5) 00100  | TACTT  | 0.04728      | (0.010) | 0.09494   | (0.019) | 0.62671     | (0.330) | 1.87       | (0.98, 3.58)        | 1.90    | 0.058   |
| 6) 00000  | TATTT  | 0.04309      | (0.011) | 0.02981   | (0.013) | 0.05093     | (0.417) | 1.05       | (0.46, 2.38)        | 0.12    | 0.903   |
| 7) 01011  | TGTCC  | 0.01692      | (0.009) | 0.01745   | (0.010) | -0.14336    | (0.574) | 0.87       | (0.28, 2.67)        | -0.25   | 0.803   |
| 8) *****  |        | 0.03006      | (xxxxx) | 0.02639   | (xxxxx) | 0.03178     | (0.613) | 1.03       | (0.31, 3.43)        | 0.05    | 0.959   |

\*\*\*\*\*

## TLR2

| Haplotype | Coding | Control Freq | (S.E.)  | Case Freq | (S.E.)  | Coefficient | (S.E.)  | Odds Ratio | Confidence Interval | Z-score | p-value |
|-----------|--------|--------------|---------|-----------|---------|-------------|---------|------------|---------------------|---------|---------|
| 1) 0100   | ACTG   | 0.38204      | (0.024) | 0.35267   | (0.031) |             |         | 1.00       |                     |         |         |
| 2) 1000   | GTTG   | 0.32516      | (0.024) | 0.37835   | (0.030) | 0.19473     | (0.176) | 1.21       | (0.86, 1.72)        | 1.10    | 0.270   |
| 3) 0000   | ATTG   | 0.20561      | (0.020) | 0.17758   | (0.026) | -0.07878    | (0.225) | 0.92       | (0.59, 1.44)        | -0.35   | 0.726   |
| 4) 0110   | ACCG   | 0.07271      | (0.013) | 0.08373   | (0.017) | 0.31028     | (0.298) | 1.36       | (0.76, 2.44)        | 1.04    | 0.297   |

\*\*\*\*\*

## TLR3

| Haplotype | Coding | Control Freq | (S.E.)  | Case Freq | (S.E.)  | Coefficient | (S.E.)  | Odds Ratio | Confidence Interval | Z-score | p-value |
|-----------|--------|--------------|---------|-----------|---------|-------------|---------|------------|---------------------|---------|---------|
| 1) 000    | CCC    | 0.31635      | (0.021) | 0.39744   | (0.016) |             |         | 1.00       |                     |         |         |
| 2) 001    | CCT    | 0.27948      | (0.022) | 0.24597   | (0.039) | -0.32186    | (0.211) | 0.72       | (0.48, 1.10)        | -1.53   | 0.127   |
| 3) 010    | CTC    | 0.20838      | (0.020) | 0.19805   | (0.038) | -0.33444    | (0.223) | 0.72       | (0.46, 1.11)        | -1.50   | 0.134   |
| 4) 100    | TCC    | 0.18123      | (0.019) | 0.15351   | (0.028) | -0.33876    | (0.255) | 0.71       | (0.43, 1.18)        | -1.33   | 0.184   |

\*\*\*\*\*

## TLR6

| Haplotype | Coding | Control Freq | (S.E.)  | Case Freq | (S.E.)  | Coefficient | (S.E.)  | Odds Ratio | Confidence Interval | Z-score | p-value |
|-----------|--------|--------------|---------|-----------|---------|-------------|---------|------------|---------------------|---------|---------|
| 1) 010    | GCC    | 0.45798      | (0.022) | 0.42848   | (0.028) |             |         | 1.00       |                     |         |         |
| 2) 001    | GTG    | 0.34343      | (0.021) | 0.33826   | (0.030) | 0.04969     | (0.182) | 1.05       | (0.73, 1.50)        | 0.27    | 0.785   |
| 3) 100    | ATC    | 0.18726      | (0.019) | 0.22554   | (0.024) | 0.28279     | (0.216) | 1.33       | (0.87, 2.03)        | 1.31    | 0.191   |

\*\*\*\*\*

## CD14

Number of haplotypes is 9

| Haplotype | Coding | Control Freq | (S.E.)  | Case Freq | (S.E.)  | Coefficient | (S.E.)  | Odds Ratio | Confidence Interval | Z-score | p-value |
|-----------|--------|--------------|---------|-----------|---------|-------------|---------|------------|---------------------|---------|---------|
| 1) 0010   | TCTG   | 0.51148      | (0.023) | 0.44270   | (0.030) |             |         | 1.00       |                     |         |         |
| 2) 1000   | ACCG   | 0.23536      | (0.020) | 0.28509   | (0.029) | 0.37790     | (0.199) | 1.46       | (0.99, 2.15)        | 1.90    | 0.057   |
| 3) 0100   | TTCG   | 0.12066      | (0.014) | 0.13162   | (0.022) | 0.23184     | (0.260) | 1.26       | (0.76, 2.10)        | 0.89    | 0.373   |
| 4) 0101   | TTCC   | 0.11592      | (0.015) | 0.11072   | (0.020) | 0.17863     | (0.262) | 1.20       | (0.71, 2.00)        | 0.68    | 0.496   |
| 5) 0000   | TCCG   | 0.01180      | (0.007) | 0.01839   | (0.009) | 0.47513     | (0.694) | 1.61       | (0.41, 6.27)        | 0.68    | 0.494   |

\*\*\*\*\*

## TNF

| Haplotype | Coding | Control Freq | (S.E.)  | Case Freq | (S.E.)  | Coefficient | (S.E.)  | Odds Ratio | Confidence Interval | Z-score | p-value |
|-----------|--------|--------------|---------|-----------|---------|-------------|---------|------------|---------------------|---------|---------|
| 1) 0000   | GGGG   | 0.78789      | (0.018) | 0.83633   | (0.008) |             |         | 1.00       |                     |         |         |
| 2) 1001   | AGGA   | 0.10656      | (0.015) | 0.07377   | (0.029) | -0.48985    | (0.285) | 0.61       | (0.35, 1.07)        | -1.72   | 0.086   |
| 3) 1000   | AGGG   | 0.04793      | (0.011) | 0.04082   | (0.029) | -0.27814    | (0.380) | 0.76       | (0.36, 1.59)        | -0.73   | 0.464   |

|         |      |         |         |         |         |          |         |      |              |       |       |
|---------|------|---------|---------|---------|---------|----------|---------|------|--------------|-------|-------|
| 4) 0110 | GAAG | 0.02836 | (0.010) | 0.02219 | (0.022) | -0.16761 | (0.578) | 0.85 | (0.27, 2.63) | -0.29 | 0.772 |
| 5) 0100 | GAGG | 0.02647 | (0.011) | 0.02424 | (0.028) | 0.08986  | (0.527) | 1.09 | (0.39, 3.08) | 0.17  | 0.865 |

\*\*\*\*\*

## IL-6

| Haplotype | Coding | Control Freq | (S.E.)  | Case Freq | (S.E.)  | Coefficient | (S.E.)  | Odds Ratio | Confidence Interval | Z-score | p-value |
|-----------|--------|--------------|---------|-----------|---------|-------------|---------|------------|---------------------|---------|---------|
| 1) 001    | GGG    | 0.34210      | (0.022) | 0.31395   | (0.044) |             |         | 1.00       |                     |         |         |
| 2) 010    | GCC    | 0.29820      | (0.022) | 0.30735   | (0.017) | 0.12035     | (0.203) | 1.13       | (0.76, 1.68)        | 0.59    | 0.554   |
| 3) 000    | GGC    | 0.28429      | (0.022) | 0.30823   | (0.033) | 0.18823     | (0.193) | 1.21       | (0.83, 1.76)        | 0.98    | 0.328   |
| 4) 110    | TCC    | 0.06868      | (0.013) | 0.07046   | (0.029) | 0.17008     | (0.348) | 1.19       | (0.60, 2.34)        | 0.49    | 0.625   |

\*\*\*\*\*

## TLR4

| Haplotype   | Coding   | Control Freq | (S.E.)  | Case Freq | (S.E.)  | Coefficient | (S.E.)  | Odds Ratio | Confidence Interval | Z-score | p-value |
|-------------|----------|--------------|---------|-----------|---------|-------------|---------|------------|---------------------|---------|---------|
| 1) 01000000 | AAATCAGG | 0.26055      | (0.020) | 0.25375   | (0.028) |             |         | 1.00       |                     |         |         |
| 2) 10000000 | GGATCAGG | 0.25991      | (0.020) | 0.25753   | (0.028) | 0.05272     | (0.225) | 1.05       | (0.68, 1.64)        | 0.23    | 0.815   |
| 3) 01000010 | AAATCAGG | 0.14252      | (0.015) | 0.12667   | (0.024) | -0.02379    | (0.301) | 0.98       | (0.54, 1.76)        | -0.08   | 0.937   |
| 4) 00110000 | AGGCCAGG | 0.10591      | (0.015) | 0.10314   | (0.017) | 0.01287     | (0.276) | 1.01       | (0.59, 1.74)        | 0.05    | 0.963   |
| 5) 00101001 | AGGTAAGC | 0.09210      | (0.014) | 0.09533   | (0.019) | -0.05512    | (0.310) | 0.95       | (0.52, 1.74)        | -0.18   | 0.859   |
| 6) 00100100 | AGTCCGGC | 0.04845      | (0.010) | 0.06391   | (0.015) | 0.31930     | (0.355) | 1.38       | (0.69, 2.76)        | 0.90    | 0.368   |
| 7) 00110001 | AGGCCAGC | 0.04666      | (0.009) | 0.03011   | (0.013) | -0.67389    | (0.470) | 0.51       | (0.20, 1.28)        | -1.43   | 0.152   |
| 8) 00100000 | AGGTCAGG | 0.02365      | (0.007) | 0.03967   | (0.013) | 0.40004     | (0.529) | 1.49       | (0.53, 4.21)        | 0.76    | 0.450   |
| 9) 00101000 | AGGTAAGG | 0.01362      | (0.008) | 0.02121   | (0.010) | 0.45369     | (0.651) | 1.57       | (0.44, 5.64)        | 0.70    | 0.486   |

\*\*\*\*\*

## TIRAP

| Haplotype | Coding | Control Freq | (S.E.)  | Case Freq | (S.E.)  | Coefficient | (S.E.)  | Odds Ratio | Confidence Interval | Z-score | p-value |
|-----------|--------|--------------|---------|-----------|---------|-------------|---------|------------|---------------------|---------|---------|
| 1) 01000  | GGTGC  | 0.25133      | (0.022) | 0.21562   | (0.037) |             |         | 1.00       |                     |         |         |
| 2) 10000  | CCCCG  | 0.22807      | (0.021) | 0.22932   | (0.028) | 0.18965     | (0.219) | 1.21       | (0.79, 1.86)        | 0.87    | 0.386   |
| 3) 00001  | GCTGT  | 0.21563      | (0.019) | 0.21804   | (0.026) | 0.30535     | (0.242) | 1.36       | (0.85, 2.18)        | 1.26    | 0.206   |
| 4) 00000  | GCTGC  | 0.15130      | (0.015) | 0.16408   | (0.015) | 0.20586     | (0.258) | 1.23       | (0.74, 2.04)        | 0.80    | 0.425   |
| 5) 00110  | GCCAC  | 0.10712      | (0.016) | 0.12164   | (0.030) | 0.30811     | (0.288) | 1.36       | (0.77, 2.39)        | 1.07    | 0.285   |
| 6) 00111  | GCCAT  | 0.03055      | (0.008) | 0.01880   | (0.016) | -0.73363    | (0.555) | 0.48       | (0.16, 1.42)        | -1.32   | 0.186   |
| 7) 00100  | GCCGC  | 0.01110      | (0.007) | 0.02256   | (0.017) | 0.62270     | (0.698) | 1.86       | (0.47, 7.32)        | 0.89    | 0.372   |

\*\*\*\*\*

## TRAF6

| Haplotype | Coding | Control Freq | (S.E.)  | Case Freq | (S.E.)  | Coefficient | (S.E.)  | Odds Ratio | Confidence Interval | Z-score | p-value |
|-----------|--------|--------------|---------|-----------|---------|-------------|---------|------------|---------------------|---------|---------|
| 1) 000    | GTA    | 0.59269      | (0.022) | 0.61482   | (0.027) |             |         | 1.00       |                     |         |         |
| 2) 011    | GCC    | 0.14428      | (0.017) | 0.15020   | (0.027) | -0.02717    | (0.232) | 0.97       | (0.62, 1.53)        | -0.12   | 0.907   |
| 3) 001    | GTC    | 0.14328      | (0.017) | 0.11070   | (0.016) | -0.28948    | (0.251) | 0.75       | (0.46, 1.22)        | -1.15   | 0.249   |
| 4) 101    | ATC    | 0.11975      | (0.015) | 0.11964   | (0.025) | -0.00626    | (0.262) | 0.99       | (0.60, 1.66)        | -0.02   | 0.981   |

\*\*\*\*\*

## IRAK4

| Haplotype | Coding | Control Freq | (S.E.)  | Case Freq | (S.E.)  | Coefficient | (S.E.)  | Odds Ratio | Confidence Interval | Z-score | p-value |
|-----------|--------|--------------|---------|-----------|---------|-------------|---------|------------|---------------------|---------|---------|
| 1) 100    | AGG    | 0.29431      | (0.056) | 0.16710   | (0.059) |             |         | 1.00       |                     |         |         |
| 2) 000    | GGG    | 0.20413      | (0.046) | 0.34310   | (0.057) | -0.29939    | (2.096) | 0.74       | (0.01, 45.08)       | -0.14   | 0.886   |
| 3) 011    | GAC    | 0.17193      | (0.075) | 0.12181   | (0.090) | -0.14321    | (1.569) | 0.87       | (0.04, 18.77)       | -0.09   | 0.927   |
| 4) 001    | GGC    | 0.14685      | (0.057) | 0.04812   | (0.262) | -0.76325    | (2.958) | 0.47       | (0.00, 153.48)      | -0.26   | 0.796   |
| 5) 101    | AGC    | 0.10136      | (0.084) | 0.17476   | (0.082) | 0.18165     | (0.965) | 1.20       | (0.18, 7.95)        | 0.19    | 0.851   |
| 6) 111    | AAC    | 0.08142      | (0.229) | 0.14511   | (0.057) | -0.53585    | (0.783) | 0.59       | (0.13, 2.72)        | -0.68   | 0.494   |

\*\*\*\*\*

## BPI

| Haplotype    | Coding   | Control Freq | (S.E.)  | Case Freq | (S.E.)  | Coefficient | (S.E.)  | Odds Ratio | Confidence Interval | Z-score | p-value |
|--------------|----------|--------------|---------|-----------|---------|-------------|---------|------------|---------------------|---------|---------|
| 1) 00001110  | CGGAATGG | 0.25083      | (0.020) | 0.18289   | (0.025) |             |         | 1.00       |                     |         |         |
| 2) 11000001  | GAGAGCAA | 0.13653      | (0.016) | 0.12254   | (0.022) | 0.20059     | (0.302) | 1.22       | (0.68, 2.21)        | 0.66    | 0.506   |
| 3) 01000001  | CAGAGCAA | 0.09506      | (0.014) | 0.10541   | (0.021) | 0.43804     | (0.309) | 1.55       | (0.84, 2.84)        | 1.42    | 0.157   |
| 4) 01000010  | CAGAGCGG | 0.08075      | (0.014) | 0.08294   | (0.022) | 0.23844     | (0.346) | 1.27       | (0.64, 2.50)        | 0.69    | 0.491   |
| 5) 00101010  | CGCAACGG | 0.06023      | (0.012) | 0.06021   | (0.015) | 0.39324     | (0.406) | 1.48       | (0.67, 3.28)        | 0.97    | 0.333   |
| 6) 00001101  | CGGAATAA | 0.05427      | (0.013) | 0.10151   | (0.019) | 1.13209     | (0.392) | 3.10       | (1.44, 6.68)        | 2.89    | 0.004   |
| 7) 00010000  | CGGGCAG  | 0.04064      | (0.010) | 0.04201   | (0.014) | 0.19822     | (0.419) | 1.22       | (0.54, 2.77)        | 0.47    | 0.636   |
| 8) 00101110  | CGCAATGG | 0.04054      | (0.010) | 0.02477   | (0.010) | 0.03034     | (0.548) | 1.03       | (0.35, 3.02)        | 0.06    | 0.956   |
| 9) 00010001  | CGGGCAA  | 0.03486      | (0.010) | 0.04101   | (0.014) | 0.50799     | (0.471) | 1.66       | (0.66, 4.19)        | 1.08    | 0.281   |
| 10) 00010010 | CGGGCGG  | 0.02670      | (0.009) | 0.03088   | (0.013) | 0.83772     | (0.502) | 2.31       | (0.86, 6.18)        | 1.67    | 0.095   |
| 11) 01000000 | CAGAGCAG | 0.02356      | (0.008) | 0.03520   | (0.016) | 0.98609     | (0.558) | 2.68       | (0.90, 8.00)        | 1.77    | 0.077   |
| 12) 00001000 | CGGAACAG | 0.01949      | (0.007) | 0.00562   | (xxxxx) | -1.29947    | (1.370) | 0.27       | (0.02, 3.99)        | -0.95   | 0.343   |
| 13) 11000010 | GAGACCGG | 0.01765      | (0.008) | 0.04058   | (0.015) | 1.09850     | (0.590) | 3.00       | (0.94, 9.54)        | 1.86    | 0.063   |
| 14) 00001001 | CGGAACAA | 0.01649      | (0.007) | 0.03444   | (0.012) | 1.18810     | (0.572) | 3.28       | (1.07, 10.07)       | 2.08    | 0.038   |

\*\*\*\*\*

## LBP

| Haplotype value | Coding | Control | (S.E.) | Case | (S.E.) | Coefficient | (S.E.) | Odds | Confidence | Z-score | p- |
|-----------------|--------|---------|--------|------|--------|-------------|--------|------|------------|---------|----|
|-----------------|--------|---------|--------|------|--------|-------------|--------|------|------------|---------|----|

|                |             | Freq    | (S.E.)  | Freq    | (S.E.)  |          |         | Ratio | Interval      |       |
|----------------|-------------|---------|---------|---------|---------|----------|---------|-------|---------------|-------|
| 1) 0000001001  | CAAGTGGCTT  | 0.32530 | (0.023) | 0.26513 | (0.028) |          |         | 1.00  |               |       |
| 2) 1000100000  | TAAGCGACTC  | 0.22368 | (0.019) | 0.25939 | (0.027) | 0.36362  | (0.215) | 1.44  | (0.94, 2.19)  | 1.69  |
| 0.091          |             |         |         |         |         |          |         |       |               |       |
| 3) 0000100000  | CAAGCGACTC  | 0.06141 | (0.012) | 0.05976 | (0.014) | 0.34936  | (0.346) | 1.42  | (0.72, 2.79)  | 1.01  |
| 0.312          |             |         |         |         |         |          |         |       |               |       |
| 4) 0000001000  | CAAGTGGCTC  | 0.05109 | (0.011) | 0.04984 | (0.014) | 0.23526  | (0.432) | 1.27  | (0.54, 2.95)  | 0.55  |
| 0.586          |             |         |         |         |         |          |         |       |               |       |
| 5) 0110100000  | CTGGCGACTC  | 0.04265 | (0.011) | 0.04950 | (0.017) | 0.13135  | (0.372) | 1.14  | (0.55, 2.37)  | 0.35  |
| 0.724          |             |         |         |         |         |          |         |       |               |       |
| 6) 0000001011  | CAAGTGGCAT  | 0.03701 | (0.010) | 0.03953 | (0.015) | 0.31935  | (0.419) | 1.38  | (0.61, 3.13)  | 0.76  |
| 0.445          |             |         |         |         |         |          |         |       |               |       |
| 7) 0000000000  | CAAGTGGACTC | 0.03680 | (0.010) | 0.01006 | (0.008) | -0.60531 | (0.530) | 0.55  | (0.19, 1.54)  | -1.14 |
| 0.254          |             |         |         |         |         |          |         |       |               |       |
| 8) 1000010100  | TAAGTTATTC  | 0.03545 | (0.009) | 0.07733 | (0.016) | 1.02941  | (0.417) | 2.80  | (1.24, 6.34)  | 2.47  |
| 0.014          |             |         |         |         |         |          |         |       |               |       |
| 9) 0100000000  | CTAGTGACTC  | 0.01885 | (0.008) | 0.01515 | (0.007) | 0.16988  | (0.764) | 1.19  | (0.27, 5.30)  | 0.22  |
| 0.824          |             |         |         |         |         |          |         |       |               |       |
| 10) 0110100001 | CTGGCGACTT  | 0.00785 | (0.005) | 0.02808 | (0.011) | 1.56959  | (0.864) | 4.80  | (0.88, 26.11) | 1.82  |
| 0.069          |             |         |         |         |         |          |         |       |               |       |

## Donor haplotypes

IL-10

| Haplotype | Coding | Control Freq | (S.E.)  | Case Freq | (S.E.)  | Coefficient | (S.E.)  | Odds Ratio | Confidence Interval | Z-score | p-value |
|-----------|--------|--------------|---------|-----------|---------|-------------|---------|------------|---------------------|---------|---------|
| 1) 0000   | ACAG   | 0.28448      | (0.021) | 0.25371   | (0.026) |             |         | 1.00       |                     |         |         |
| 2) 0100   | AAAG   | 0.24963      | (0.021) | 0.25233   | (0.034) | 0.24050     | (0.212) | 1.27       | (0.84, 1.93)        | 1.14    | 0.256   |
| 3) 1010   | GCTG   | 0.24521      | (0.023) | 0.23307   | (0.024) | 0.02764     | (0.227) | 1.03       | (0.66, 1.60)        | 0.12    | 0.903   |
| 4) 1001   | GCAT   | 0.14931      | (0.016) | 0.17364   | (0.024) | 0.34778     | (0.255) | 1.42       | (0.86, 2.33)        | 1.36    | 0.173   |
| 5) 1000   | GCAG   | 0.06380      | (0.015) | 0.07824   | (0.014) | 0.33826     | (0.337) | 1.40       | (0.72, 2.71)        | 1.00    | 0.315   |

\*\*\*\*\*

IL-1b

| Haplotype | Coding | Control Freq | (S.E.)  | Case Freq | (S.E.)  | Coefficient | (S.E.)  | Odds Ratio | Confidence Interval | Z-score | p-value |
|-----------|--------|--------------|---------|-----------|---------|-------------|---------|------------|---------------------|---------|---------|
| 1) 0100   | TACG   | 0.37570      | (0.012) | 0.34162   | (0.032) |             |         | 1.00       |                     |         |         |
| 2) 1000   | CGCG   | 0.29302      | (0.031) | 0.28283   | (0.028) | 0.14926     | (0.189) | 1.16       | (0.80, 1.68)        | 0.79    | 0.430   |
| 3) 0011   | TGTC   | 0.18263      | (0.036) | 0.20522   | (0.026) | 0.31395     | (0.183) | 1.37       | (0.96, 1.96)        | 1.72    | 0.086   |
| 4) 0000   | TGCG   | 0.11264      | (0.024) | 0.11271   | (0.023) | 0.05701     | (0.328) | 1.06       | (0.56, 2.01)        | 0.17    | 0.862   |
| 5) 1100   | CACG   | 0.02018      | (0.037) | 0.01472   | (0.039) | -0.18906    | (1.107) | 0.83       | (0.09, 7.24)        | -0.17   | 0.864   |
| 6) 1011   | CGTC   | 0.01335      | (0.108) | 0.04290   | (0.023) | 1.32855     | (0.966) | 3.78       | (0.57, 25.08)       | 1.38    | 0.169   |

\*\*\*\*\*

IL-1rn

| Haplotype | Coding | Control Freq | (S.E.)  | Case Freq | (S.E.)  | Coefficient | (S.E.)  | Odds Ratio | Confidence Interval | Z-score | p-value |
|-----------|--------|--------------|---------|-----------|---------|-------------|---------|------------|---------------------|---------|---------|
| 1) 10000  | CATTT  | 0.37759      | (0.023) | 0.37529   | (0.033) |             |         | 1.00       |                     |         |         |
| 2) 01010  | TGTCT  | 0.23373      | (0.019) | 0.25025   | (0.026) | 0.02062     | (0.220) | 1.02       | (0.66, 1.57)        | 0.09    | 0.925   |
| 3) 00101  | TACTC  | 0.12956      | (0.017) | 0.09285   | (0.019) | -0.37255    | (0.267) | 0.69       | (0.41, 1.16)        | -1.40   | 0.163   |
| 4) 01001  | TGTTT  | 0.11710      | (0.017) | 0.14538   | (0.021) | -0.19692    | (0.246) | 1.22       | (0.75, 1.97)        | 0.80    | 0.423   |
| 5) 01010  | TACTT  | 0.04220      | (0.009) | 0.04340   | (0.014) | -0.06061    | (0.429) | 0.94       | (0.41, 2.18)        | -0.14   | 0.888   |
| 6) 00000  | TATTT  | 0.03438      | (0.011) | 0.02413   | (0.012) | -0.05235    | (0.377) | 0.95       | (0.45, 1.99)        | -0.14   | 0.889   |
| 7) 01000  | TGTTT  | 0.02247      | (0.008) | 0.02734   | (0.011) | 0.27584     | (0.558) | 1.32       | (0.44, 3.93)        | 0.49    | 0.621   |

\*\*\*\*\*

TLR2

| Haplotype | Coding | Control Freq | (S.E.)  | Case Freq | (S.E.)  | Coefficient | (S.E.)  | Odds Ratio | Confidence Interval | Z-score | p-value |
|-----------|--------|--------------|---------|-----------|---------|-------------|---------|------------|---------------------|---------|---------|
| 1) 1000   | GTTG   | 0.34186      | (0.025) | 0.34496   | (0.033) |             |         | 1.00       |                     |         |         |
| 2) 0100   | ACTG   | 0.32530      | (0.022) | 0.35909   | (0.032) | 0.16256     | (0.185) | 1.18       | (0.82, 1.69)        | 0.88    | 0.379   |
| 3) 0000   | ATTG   | 0.23455      | (0.018) | 0.20269   | (0.023) | -0.12141    | (0.228) | 0.89       | (0.57, 1.38)        | -0.53   | 0.594   |
| 4) 0110   | ACCG   | 0.07444      | (0.013) | 0.06868   | (0.017) | -0.12235    | (0.314) | 0.88       | (0.48, 1.64)        | -0.39   | 0.697   |

\*\*\*\*\*

TLR3

| Haplotype | Coding | Control Freq | (S.E.)  | Case Freq | (S.E.)  | Coefficient | (S.E.)  | Odds Ratio | Confidence Interval | Z-score | p-value |
|-----------|--------|--------------|---------|-----------|---------|-------------|---------|------------|---------------------|---------|---------|
| 1) 000    | CCC    | 0.36179      | (0.024) | 0.38538   | (0.017) |             |         | 1.00       |                     |         |         |
| 2) 001    | CCT    | 0.29594      | (0.023) | 0.27265   | (0.066) | -0.07672    | (0.190) | 0.93       | (0.64, 1.34)        | -0.40   | 0.687   |
| 3) 010    | CTC    | 0.17925      | (0.017) | 0.20015   | (0.047) | 0.07863     | (0.246) | 1.08       | (0.67, 1.75)        | 0.32    | 0.749   |
| 4) 100    | TCC    | 0.15482      | (0.017) | 0.12759   | (0.055) | -0.26336    | (0.253) | 0.77       | (0.47, 1.26)        | -1.04   | 0.297   |

\*\*\*\*\*

TLR6

| Haplotype | Coding | Control Freq | (S.E.)  | Case Freq | (S.E.)  | Coefficient | (S.E.)  | Odds Ratio | Confidence Interval | Z-score | p-value |
|-----------|--------|--------------|---------|-----------|---------|-------------|---------|------------|---------------------|---------|---------|
| 1) 010    | GCC    | 0.44316      | (0.023) | 0.46234   | (0.033) |             |         | 1.00       |                     |         |         |
| 2) 001    | GTG    | 0.35150      | (0.021) | 0.31579   | (0.028) | -0.18729    | (0.189) | 0.83       | (0.57, 1.20)        | -0.99   | 0.321   |
| 3) 100    | ATC    | 0.20073      | (0.020) | 0.21798   | (0.024) | 0.02379     | (0.202) | 1.02       | (0.69, 1.52)        | 0.12    | 0.906   |

\*\*\*\*\*

## CD14

| Haplotype | Coding | Control Freq | (S.E.)  | Case Freq | (S.E.)  | Coefficient | (S.E.)  | Odds Ratio | Confidence Interval | Z-score | p-value |
|-----------|--------|--------------|---------|-----------|---------|-------------|---------|------------|---------------------|---------|---------|
| 1) 0010   | TCTG   | 0.44482      | (0.022) | 0.46241   | (0.031) |             |         | 1.00       |                     |         |         |
| 2) 1000   | ACCG   | 0.25801      | (0.021) | 0.25510   | (0.027) | -0.06524    | (0.209) | 0.94       | (0.62, 1.41)        | -0.31   | 0.754   |
| 3) 0100   | TTCG   | 0.17195      | (0.018) | 0.16213   | (0.014) | -0.12265    | (0.222) | 0.88       | (0.57, 1.37)        | -0.55   | 0.581   |
| 4) 0101   | TTCC   | 0.10632      | (0.014) | 0.10062   | (0.028) | -0.02973    | (0.277) | 0.97       | (0.56, 1.67)        | -0.11   | 0.914   |
| 5) 0000   | TCCG   | 0.01212      | (0.009) | 0.01974   | (0.017) | 0.21161     | (0.558) | 1.24       | (0.41, 3.69)        | 0.38    | 0.704   |

\*\*\*\*\*

## TNF

| Haplotype | Coding | Control Freq | (S.E.)  | Case Freq | (S.E.)  | Coefficient | (S.E.)  | Odds Ratio | Confidence Interval | Z-score | p-value |
|-----------|--------|--------------|---------|-----------|---------|-------------|---------|------------|---------------------|---------|---------|
| 1) 0000   | GGGG   | 0.80901      | (0.017) | 0.81077   | (0.008) |             |         | 1.00       |                     |         |         |
| 2) 1001   | AGGA   | 0.10307      | (0.015) | 0.08369   | (0.030) | -0.23904    | (0.266) | 0.79       | (0.47, 1.33)        | -0.90   | 0.368   |
| 3) 1000   | AGGG   | 0.03740      | (0.011) | 0.04134   | (0.026) | 0.01929     | (0.406) | 1.02       | (0.46, 2.26)        | 0.05    | 0.962   |
| 4) 0110   | GAAG   | 0.02880      | (0.011) | 0.02160   | (0.027) | 0.26975     | (0.499) | 1.27       | (0.48, 3.37)        | 0.48    | 0.635   |
| 5) 0100   | GAGG   | 0.01958      | (0.012) | 0.03192   | (0.026) | 0.46893     | (0.460) | 1.60       | (0.65, 3.94)        | 1.02    | 0.308   |

\*\*\*\*\*

## IL-6

| Haplotype | Coding | Control Freq | (S.E.)  | Case Freq | (S.E.)  | Coefficient | (S.E.)  | Odds Ratio | Confidence Interval | Z-score | p-value |
|-----------|--------|--------------|---------|-----------|---------|-------------|---------|------------|---------------------|---------|---------|
| 1) 010    | GCC    | 0.31134      | (0.022) | 0.29875   | (0.048) |             |         | 1.00       |                     |         |         |
| 2) 000    | GGC    | 0.30550      | (0.023) | 0.28934   | (0.010) | 0.08518     | (0.197) | 1.09       | (0.74, 1.60)        | 0.43    | 0.666   |
| 3) 001    | GGG    | 0.28919      | (0.023) | 0.31083   | (0.047) | 0.26975     | (0.214) | 1.31       | (0.86, 1.99)        | 1.26    | 0.207   |
| 4) 110    | TCC    | 0.08733      | (0.013) | 0.09548   | (0.032) | 0.23863     | (0.316) | 1.27       | (0.68, 2.36)        | 0.76    | 0.449   |

\*\*\*\*\*

## TLR4

| Haplotype   | Coding   | Control Freq | (S.E.)  | Case Freq | (S.E.)  | Coefficient | (S.E.)  | Odds Ratio | Confidence Interval | Z-score | p-value |
|-------------|----------|--------------|---------|-----------|---------|-------------|---------|------------|---------------------|---------|---------|
| 1) 01000000 | AAATCAGG | 0.27778      | (0.019) | 0.24620   | (0.027) |             |         | 1.00       |                     |         |         |
| 2) 10000000 | GGATCAGG | 0.27382      | (0.021) | 0.25660   | (0.029) | 0.08780     | (0.229) | 1.09       | (0.70, 1.71)        | 0.38    | 0.702   |
| 3) 01000010 | AAATCAGC | 0.12363      | (0.016) | 0.13513   | (0.022) | 0.22459     | (0.268) | 1.25       | (0.74, 2.12)        | 0.84    | 0.402   |
| 4) 00101001 | AGGTAAGC | 0.11169      | (0.015) | 0.10873   | (0.019) | -0.00179    | (0.296) | 1.00       | (0.56, 1.78)        | -0.01   | 0.995   |
| 5) 00110000 | AGCCAGG  | 0.09233      | (0.014) | 0.10970   | (0.018) | 0.20685     | (0.325) | 1.23       | (0.65, 2.33)        | 0.64    | 0.525   |
| 6) 00110001 | AGCCAGC  | 0.04374      | (0.010) | 0.04034   | (0.013) | 0.05238     | (0.400) | 1.05       | (0.48, 2.31)        | 0.13    | 0.896   |
| 7) 00100100 | AGTCCGG  | 0.03275      | (0.008) | 0.06015   | (0.015) | 0.72862     | (0.397) | 2.07       | (0.95, 4.52)        | 1.83    | 0.067   |
| 8) 00100000 | AGTCCAGG | 0.00956      | (0.005) | 0.02256   | (0.010) | 0.78508     | (0.688) | 2.19       | (0.57, 8.44)        | 1.14    | 0.254   |

\*\*\*\*\*

## TIRAP

| Haplotype | Coding | Control Freq | (S.E.)  | Case Freq | (S.E.)  | Coefficient | (S.E.)  | Odds Ratio | Confidence Interval | Z-score | p-value |
|-----------|--------|--------------|---------|-----------|---------|-------------|---------|------------|---------------------|---------|---------|
| 1) 10100  | CCCGC  | 0.25854      | (0.020) | 0.20197   | (0.026) |             |         | 1.00       |                     |         |         |
| 2) 01000  | GGTGC  | 0.25079      | (0.021) | 0.22168   | (0.034) | 0.08035     | (0.233) | 1.08       | (0.69, 1.71)        | 0.35    | 0.730   |
| 3) 00001  | GCTGT  | 0.20137      | (0.018) | 0.21689   | (0.028) | 0.23969     | (0.263) | 1.27       | (0.76, 2.13)        | 0.91    | 0.362   |
| 4) 00110  | GCCAC  | 0.12516      | (0.017) | 0.12782   | (0.024) | 0.20274     | (0.284) | 1.22       | (0.70, 2.14)        | 0.71    | 0.476   |
| 5) 00000  | GCTGC  | 0.11741      | (0.015) | 0.17033   | (0.015) | 0.68108     | (0.269) | 1.98       | (1.17, 3.35)        | 2.53    | 0.011   |
| 6) 00111  | GCCAT  | 0.02609      | (0.007) | 0.03008   | (0.014) | 0.28486     | (0.493) | 1.33       | (0.51, 3.50)        | 0.58    | 0.564   |
| 7) 00100  | GCCGC  | 0.02065      | (0.008) | 0.01116   | (0.026) | -0.23203    | (0.623) | 0.79       | (0.23, 2.69)        | -0.37   | 0.710   |

\*\*\*\*\*

## TRAF6

| Haplotype | Coding | Control Freq | (S.E.)  | Case Freq | (S.E.)  | Coefficient | (S.E.)  | Odds Ratio | Confidence Interval | Z-score | p-value |
|-----------|--------|--------------|---------|-----------|---------|-------------|---------|------------|---------------------|---------|---------|
| 1) 000    | GTA    | 0.61583      | (0.023) | 0.63258   | (0.032) |             |         | 1.00       |                     |         |         |
| 2) 001    | GTC    | 0.14117      | (0.017) | 0.14185   | (0.020) | -0.00756    | (0.231) | 0.99       | (0.63, 1.56)        | -0.03   | 0.974   |
| 3) 101    | ATC    | 0.12112      | (0.015) | 0.10150   | (0.021) | -0.27225    | (0.271) | 0.76       | (0.45, 1.30)        | -1.00   | 0.315   |
| 4) 011    | GCC    | 0.11650      | (0.016) | 0.12406   | (0.020) | 0.00579     | (0.245) | 1.01       | (0.62, 1.63)        | 0.02    | 0.981   |

\*\*\*\*\*

## IRAK4

| Haplotype | Coding | Control Freq | (S.E.)  | Case Freq | (S.E.)  | Coefficient | (S.E.)  | Odds Ratio | Confidence Interval | Z-score | p-value |
|-----------|--------|--------------|---------|-----------|---------|-------------|---------|------------|---------------------|---------|---------|
| 1) 000    | GGG    | 0.27226      | (0.114) | 0.24046   | (0.057) |             |         | 1.00       |                     |         |         |
| 2) 100    | AGG    | 0.25357      | (0.041) | 0.26463   | (0.123) | 0.84790     | (0.804) | 2.33       | (0.48, 11.28)       | 1.05    | 0.291   |
| 3) 011    | GAC    | 0.13838      | (0.076) | 0.10541   | (0.089) | -0.56911    | (0.828) | 0.57       | (0.11, 2.87)        | -0.69   | 0.492   |
| 4) 101    | AGC    | 0.11884      | (0.160) | 0.08891   | (0.528) | 0.48989     | (1.832) | 1.63       | (0.05, 59.17)       | 0.27    | 0.789   |
| 5) 111    | AAC    | 0.11825      | (0.087) | 0.14468   | (0.102) | 1.35319     | (1.151) | 3.87       | (0.41, 36.96)       | 1.18    | 0.240   |
| 6) 001    | GGC    | 0.09870      | (0.470) | 0.15591   | (0.169) | 0.53253     | (0.848) | 1.70       | (0.32, 8.97)        | 0.63    | 0.530   |

\*\*\*\*\*

## BPI

| Haplotype   | Coding   | Control Freq | (S.E.)  | Case Freq | (S.E.)  | Coefficient | (S.E.)  | Odds Ratio | Confidence Interval | Z-score | p-value |
|-------------|----------|--------------|---------|-----------|---------|-------------|---------|------------|---------------------|---------|---------|
| 1) 00001110 | CGGAATGG | 0.22368      | (0.019) | 0.17489   | (0.024) |             |         | 1.00       |                     |         |         |
| 2) 11000001 | GAGACAA  | 0.11855      | (0.016) | 0.16906   | (0.024) | 0.76837     | (0.306) | 2.16       | (1.18, 3.93)        | 2.51    | 0.012   |

|     |          |          |         |         |         |         |          |         |      |               |       |       |
|-----|----------|----------|---------|---------|---------|---------|----------|---------|------|---------------|-------|-------|
| 3)  | 01000001 | CAGAGCAA | 0.11417 | (0.017) | 0.11686 | (0.023) | 0.27694  | (0.315) | 1.32 | (0.71, 2.45)  | 0.88  | 0.379 |
| 4)  | 01000010 | CAGAGCGG | 0.07514 | (0.014) | 0.09965 | (0.019) | 0.65752  | (0.377) | 1.93 | (0.92, 4.04)  | 1.75  | 0.081 |
| 5)  | 00001101 | CGGAATAA | 0.05943 | (0.013) | 0.07233 | (0.016) | 0.75463  | (0.417) | 2.13 | (0.94, 4.81)  | 1.81  | 0.070 |
| 6)  | 00010000 | CGGGCAG  | 0.04212 | (0.010) | 0.03472 | (0.012) | 0.02746  | (0.528) | 1.03 | (0.37, 2.89)  | 0.05  | 0.959 |
| 7)  | 00101010 | CGCAACGG | 0.04037 | (0.009) | 0.03970 | (0.012) | 0.62761  | (0.477) | 1.87 | (0.73, 4.78)  | 1.31  | 0.189 |
| 8)  | 00001000 | CGGAACAG | 0.03723 | (0.010) | 0.01448 | (0.011) | -0.69965 | (0.692) | 0.50 | (0.13, 1.93)  | -1.01 | 0.312 |
| 9)  | 11000010 | GAGAGCGG | 0.03566 | (0.010) | 0.03455 | (0.012) | 0.21603  | (0.617) | 1.24 | (0.37, 4.16)  | 0.35  | 0.726 |
| 10) | 01000000 | CAGAGCAG | 0.03563 | (0.009) | 0.02284 | (0.015) | -0.14011 | (0.762) | 0.87 | (0.20, 3.87)  | -0.18 | 0.854 |
| 11) | 00010010 | CGGGCGG  | 0.03003 | (0.010) | 0.01654 | (0.013) | -0.05427 | (0.696) | 0.95 | (0.24, 3.70)  | -0.08 | 0.938 |
| 12) | 00101110 | CGCAATGG | 0.02426 | (0.009) | 0.03775 | (0.013) | 0.87599  | (0.584) | 2.40 | (0.76, 7.55)  | 1.50  | 0.134 |
| 13) | 00010001 | CGGGCAA  | 0.02108 | (0.011) | 0.04021 | (0.014) | 1.34204  | (0.516) | 3.83 | (1.39, 10.51) | 2.60  | 0.009 |
| 14) | 00001001 | CGGAACAA | 0.01508 | (0.006) | 0.02278 | (0.012) | 0.88431  | (0.628) | 2.42 | (0.71, 8.29)  | 1.41  | 0.159 |
| 15) | 11000000 | GAGAGCAG | 0.01286 | (0.007) | 0.01558 | (0.024) | 0.36355  | (0.962) | 1.44 | (0.22, 9.48)  | 0.38  | 0.705 |

\*\*\*\*\*

LBP

| Haplotype value | Coding     | Control    | (S.E.)  | Case    | (S.E.)  | Coefficient | (S.E.)   | Odds Ratio | Confidence Interval | Z-score      | p-    |
|-----------------|------------|------------|---------|---------|---------|-------------|----------|------------|---------------------|--------------|-------|
| 1)              | 0000001001 | CAAGTGGCTT | 0.29878 | (0.023) | 0.26361 | (0.028)     |          | 1.00       |                     |              |       |
| 2)              | 1000100000 | TAAGCGACTC | 0.23074 | (0.020) | 0.27334 | (0.028)     | 0.27414  | (0.211)    | 1.32                | (0.87, 1.99) | 1.30  |
| 3)              | 0000100000 | CAAGCGACTC | 0.07042 | (0.012) | 0.04705 | (0.013)     | -0.27727 | (0.373)    | 0.76                | (0.36, 1.58) | -0.74 |
| 4)              | 0000001000 | CAAGTGGCTC | 0.05691 | (0.012) | 0.06012 | (0.018)     | 0.20136  | (0.356)    | 1.22                | (0.61, 2.46) | 0.57  |
| 5)              | 0000001011 | CAAGTGGCAT | 0.04596 | (0.010) | 0.04248 | (0.013)     | 0.05039  | (0.462)    | 1.05                | (0.43, 2.60) | 0.11  |
| 6)              | 0000000000 | CAAGTACTC  | 0.03568 | (0.009) | 0.00000 | (xxxxx)     | -1.27368 | (0.797)    | 0.28                | (0.06, 1.33) | -1.60 |
| 7)              | 1000010100 | TAAGTTATTC | 0.03519 | (0.009) | 0.06480 | (0.017)     | 0.78702  | (0.410)    | 2.20                | (0.98, 4.91) | 1.92  |
| 8)              | 0110100000 | CTGGCGACTC | 0.03518 | (0.009) | 0.05282 | (0.015)     | 0.66512  | (0.438)    | 1.94                | (0.82, 4.59) | 1.52  |
| 9)              | 0100000000 | CTAGTGACTC | 0.02387 | (0.007) | 0.01819 | (0.010)     | -0.06505 | (0.655)    | 0.94                | (0.26, 3.38) | -0.10 |
| 10)             | 1011101000 | TAGACGGCTC | 0.01996 | (0.007) | 0.01427 | (0.009)     | -0.33841 | (0.712)    | 0.71                | (0.18, 2.88) | -0.48 |
